# Supplementary material for: Identification and Profiling of MicroRNAs in the Embryonic Breast Muscle of Pekin Duck
Source: PLoS One. 2014 Jan 23;9(1):e86150. doi: 10.1371/journal.pone.0086150 (PMC3900480; doi:10.1371/journal.pone.0086150)
Supplement: Table S6 — The gene name batch viewer analysis of the targets of novel-mir-8 and novel-mir-14. (XLSX) [file pone.0086150.s006.xlsx]

## Sheet: Sheet1
Table S6 The gene name batch viewer analysis of the targets of novel-mir-8 and novel-mir-14
novel-mir-8				novel-mir-14
GENBANK_ACCESSION	Name	Species		GENBANK_ACCESSION	Name	Species
NM_001030983	similar to down-regulated by Ctnnb1, a	Gallus gallus		NM_001031350	chromosome 16 open reading frame 68	Gallus gallus
NM_001030617	hepatitis A virus cellular receptor 1	Gallus gallus		NM_001171543	similar to zygote arrest 1	Gallus gallus
NM_204426	collagen, type II, alpha 1	Gallus gallus		NM_001008677	chromatin assembly factor 1, subunit B (p60)	Gallus gallus
NM_001030821	immunoresponsive 1 homolog (mouse)	Gallus gallus		NM_001111259	natriuretic peptide precursor C	Gallus gallus
NM_205434	homeobox D13	Gallus gallus		NM_001012784	microfibrillar-associated protein 3	Gallus gallus
NM_001007894	CKLF-like MARVEL transmembrane domain containing 7	Gallus gallus		NM_001006363	RAB5A, member RAS oncogene family	Gallus gallus
NM_001024586	toll-like receptor 5	Gallus gallus		NM_001030543	electron-transfer-flavoprotein, alpha polypeptide (glutaric aciduria II)	Gallus gallus
NM_001012611	ectodysplasin A receptor	Gallus gallus		NM_204809	desmuslin	Gallus gallus
NM_001030910	Cas-Br-M (murine) ecotropic retroviral transforming sequence; ubiquitination factor E4A (UFD2 homolog, yeast)	Gallus gallus		NM_001007953	glutamate-cysteine ligase, modifier subunit	Gallus gallus
NM_001037838	deoxyribonuclease II beta; sterile alpha motif domain containing 13	Gallus gallus		NM_001006361	deafness, autosomal dominant 5	Gallus gallus
NM_001031277	deoxyribonuclease II beta; sterile alpha motif domain containing 13	Gallus gallus		NM_204918	tight junction protein 2 (zona occludens 2)	Gallus gallus
NM_001006361	deafness, autosomal dominant 5	Gallus gallus		NM_001031219	RasGEF domain family, member 1A	Gallus gallus
NM_001030792	chromatin modifying protein 2B	Gallus gallus		NM_001012730	exosome component 10	Gallus gallus
NM_001079483	metaxin 3	Gallus gallus		NM_204562	potassium channel, subfamily T, member 1	Gallus gallus
NM_204562	potassium channel, subfamily T, member 1	Gallus gallus		NM_001030885	BCL2/adenovirus E1B 19kDa interacting protein 3-like	Gallus gallus
NM_204661	mucin 5B, oligomeric mucus/gel-forming	Gallus gallus		NM_001007844	WDR45-like	Gallus gallus
NM_001030988	N-glycanase 1	Gallus gallus		NM_001080866	ras homolog gene family, member T2	Gallus gallus
NM_205321	glutamic-oxaloacetic transaminase 1, soluble (aspartate aminotransferase 1)	Gallus gallus		NM_001008448	oxysterol binding protein-like 2	Gallus gallus
NM_001030677	family with sequence similarity 125, member B	Gallus gallus		NM_001012908	ribosomal RNA processing 12 homolog (S. cerevisiae)	Gallus gallus
NM_001079477	solute carrier family 26, member 5 (prestin)	Gallus gallus		NM_001006149	T-cell immunoglobulin and mucin domain containing 4	Gallus gallus
NM_001098853	TATA box binding protein like 2	Gallus gallus		NM_205232	myeloblastosis oncogene-like 1	Gallus gallus
NM_001006382	fumarate hydratase	Gallus gallus		NM_001098853	TATA box binding protein like 2	Gallus gallus
NM_204293	calcium channel, voltage-dependent, N type, alpha 1B subunit	Gallus gallus		NM_205504	gap junction protein, alpha 5, 40kDa	Gallus gallus
NM_001031031	B-cell CLL/lymphoma 11A (zinc finger protein)	Gallus gallus		NM_001030858	tumor protein D52-like 2	Gallus gallus
NM_001162393	ubiquitin specific peptidase like 1	Gallus gallus		NM_001127170	G protein-coupled receptor 103	Gallus gallus
NM_204835	numb homolog (Drosophila)	Gallus gallus		NM_001006231	RNA polymerase II associated protein 3	Gallus gallus
NM_001030383	thyrotropin-releasing hormone	Gallus gallus		NM_001006504	NHL repeat containing 2	Gallus gallus
NM_001031553	bradykinin receptor B2	Gallus gallus		NM_205318	v-myb myeloblastosis viral oncogene homolog (avian)-like 2	Gallus gallus
NM_001012893	similar to KIAA1271 protein	Gallus gallus		NM_001030951	eukaryotic translation initiation factor 3, subunit H	Gallus gallus
NM_001079734	syntaxin binding protein 3	Gallus gallus		NM_206906	annexin A1	Gallus gallus
NM_001031555	pancreatic polypeptide receptor 1	Gallus gallus		NM_001031432	glucosamine (UDP-N-acetyl)-2-epimerase/N-acetylmannosamine kinase	Gallus gallus
NM_001004371	cadherin 11, type 2, OB-cadherin (osteoblast)	Gallus gallus		NM_204581	ribosomal protein L5	Gallus gallus
NM_001031385	heterogeneous nuclear ribonucleoprotein K	Gallus gallus		NM_204141	ribosomal protein L22	Gallus gallus
NM_001034813	calcium/calmodulin-dependent protein kinase IV	Gallus gallus		NM_204243	sema domain, immunoglobulin domain (Ig), short basic domain, secreted, (semaphorin) 3C; similar to collapsin 3	Gallus gallus
NM_001001733	calcium channel, voltage-dependent, beta 4 subunit	Gallus gallus		NM_204981	wingless-type MMTV integration site family, member 9A	Gallus gallus
NM_204246	transforming growth factor, beta receptor I (activin A receptor type II-like kinase, 53kDa)	Gallus gallus		NM_001012292	CLP1, cleavage and polyadenylation factor I subunit, homolog (S. cerevisiae)	Gallus gallus
NM_001008788	solute carrier family 30 (zinc transporter), member 7	Gallus gallus		NM_001012800	general transcription factor IIH, polypeptide 4, 52kDa	Gallus gallus
NM_001012550	proteasome (prosome, macropain) activator subunit 3 (PA28 gamma; Ki)	Gallus gallus		NM_204726	caspase 6, apoptosis-related cysteine peptidase	Gallus gallus
NM_001145389	galanin prepropeptide	Gallus gallus		NM_204508	metal response element binding transcription factor 2	Gallus gallus
NM_001159678	galanin prepropeptide	Gallus gallus		NM_205062	low density lipoprotein receptor-related protein associated protein 1	Gallus gallus
NM_001030684	general transcription factor IIIC, polypeptide 5, 63kDa	Gallus gallus		NM_204309	SRY (sex determining region Y)-box 18	Gallus gallus
NM_001006584	dihydrofolate reductase	Gallus gallus		NM_205013	lymphoid enhancer-binding factor 1; similar to lymphoid enhancer-binding factor 1	Gallus gallus
NM_001012291	proline-rich nuclear receptor coactivator 1	Gallus gallus		NM_001006279	transmembrane protein 123	Gallus gallus
NM_001031599	similar to isocitrate dehydrogenase 2 (NADP+), mitochondrial	Gallus gallus		NM_205501	argininosuccinate lyase	Gallus gallus
NM_205021	collagen, type XII, alpha 1	Gallus gallus		NM_205507	M-CK	Gallus gallus
NM_001030735	DnaJ (Hsp40) homolog, subfamily B, member 9	Gallus gallus		NM_001012565	degenerative spermatocyte homolog 1, lipid desaturase (Drosophila)	Gallus gallus
NM_204508	metal response element binding transcription factor 2	Gallus gallus		NM_205049	ras responsive element binding protein 1	Gallus gallus
NM_205348	collagen, type VI, alpha 2	Gallus gallus		NM_001007965	endosulfine alpha	Gallus gallus
NM_001006359	insulin-like growth factor 2 mRNA binding protein 3	Gallus gallus		NM_001031373	ubiquilin 4	Gallus gallus
NM_001080715	myocardin	Gallus gallus		NM_001012926	15 kDa selenoprotein	Gallus gallus
NM_204715	furin (paired basic amino acid cleaving enzyme)	Gallus gallus		NM_001139463	selenocysteine lyase	Gallus gallus
NM_206863	vav 3 oncogene	Gallus gallus		NM_001031034	phosphorylase, glycogen; brain	Gallus gallus
NM_001030668	HNF1 homeobox A	Gallus gallus		NM_001079495	actin related protein 2/3 complex, subunit 1A, 41kDa	Gallus gallus
NM_001012887	NF-kappaB repressing factor	Gallus gallus		NM_001030879	UbiA prenyltransferase domain containing 1	Gallus gallus
NM_001007972	family with sequence similarity 46, member C; similar to similar to FLJ20202 protein	Gallus gallus		NM_001006312	ADP-ribosylhydrolase like 2	Gallus gallus
NM_204845	phosphatase, orphan 1	Gallus gallus		NM_001006179	Sec23 homolog B (S. cerevisiae)	Gallus gallus
NM_001031008	testis expressed 10	Gallus gallus		NM_204762	CD9 molecule	Gallus gallus
NM_001006480	zinc finger protein 410	Gallus gallus		NM_205397	islet amyloid polypeptide	Gallus gallus
NM_001006381	UDP-N-acetyl-alpha-D-galactosamine:polypeptide N-acetylgalactosaminyltransferase 1 (GalNAc-T1)	Gallus gallus		NM_205523	glutamic-oxaloacetic transaminase 2, mitochondrial (aspartate aminotransferase 2)	Gallus gallus
NM_001006373	muted homolog (mouse)	Gallus gallus		NM_001006422	ectonucleotide pyrophosphatase/phosphodiesterase 4 (putative function)	Gallus gallus
NM_001012534	transducer of ERBB2, 2	Gallus gallus		NM_204378	Fanconi anemia, complementation group G	Gallus gallus
NM_001031543	olfactory receptor 2; olfactory receptor 4	Gallus gallus		NM_205060	sulfotransferase	Gallus gallus
NM_204304	programmed cell death 4 (neoplastic transformation inhibitor)	Gallus gallus		NM_204812	cholinergic receptor, nicotinic, beta 3	Gallus gallus
NM_001031348	vacuolar protein sorting 33 homolog B (yeast)	Gallus gallus		NM_001038586	glutamate-ammonia ligase (glutamine synthetase) domain containing 1	Gallus gallus
NM_205441	vinculin	Gallus gallus		NM_001005800	casein kinase 1, gamma 1; similar to KIAA0101	Gallus gallus
NM_001030967	ubiquitin protein ligase E3C	Gallus gallus		NM_001030849	zinc finger protein 341	Gallus gallus
NM_001079504	WD repeat domain 68	Gallus gallus		NM_205366	vasoactive intestinal peptide	Gallus gallus
NM_213587	mannan-binding lectin serine peptidase 2	Gallus gallus		NM_001031194	vacuolar protein sorting 39 homolog (S. cerevisiae)	Gallus gallus
NM_001001465	bone morphogenetic protein receptor, type II (serine/threonine kinase)	Gallus gallus		NM_001080888	ring finger and CHY zinc finger domain containing 1	Gallus gallus
NM_001031372	TAP binding protein-like; similar to TAP binding protein-like	Gallus gallus		NM_001142872	RFT1 homolog (S. cerevisiae)	Gallus gallus
NM_001006179	Sec23 homolog B (S. cerevisiae)	Gallus gallus		NM_001031593	vacuolar protein sorting 45 homolog (S. cerevisiae); similar to vacuolar protein sorting 45A (yeast)	Gallus gallus
NM_001109771	ribosomal protein S6 kinase, 90kDa, polypeptide 1	Gallus gallus		NM_001012557	core 1 synthase, glycoprotein-N-acetylgalactosamine 3-beta-galactosyltransferase, 1	Gallus gallus
NM_001012906	membrane-associated ring finger (C3HC4) 5	Gallus gallus		NM_204974	ATPase, H+ transporting, lysosomal 70kDa, V1 subunit A; similar to A2 isoform of vacuolar H+-ATPase subunit A	Gallus gallus
NM_001039603	protein kinase, AMP-activated, alpha 1 catalytic subunit	Gallus gallus		NM_204603	Sp3 transcription factor	Gallus gallus
NM_205248	cysteine and glycine-rich protein 1	Gallus gallus		NM_204989	fibrinogen gamma chain	Gallus gallus
NM_001167735	eukaryotic translation initiation factor 1	Gallus gallus		NM_001031168	transmembrane protein 129	Gallus gallus
NM_001012528	TNF receptor-associated factor 7	Gallus gallus		NM_001012319	baculoviral IAP repeat-containing 5 (survivin)	Gallus gallus
NM_205258	RAN, member RAS oncogene family pseudogene 1	Gallus gallus		NM_204235	baculoviral IAP repeat-containing 5 (survivin)	Gallus gallus
NM_001006337	LSM7 homolog, U6 small nuclear RNA associated (S. cerevisiae)	Gallus gallus		NM_001012318	baculoviral IAP repeat-containing 5 (survivin)	Gallus gallus
NM_204175	POU class 2 associating factor 1	Gallus gallus		NM_001031165	SH3-domain binding protein 2	Gallus gallus
NM_205060	sulfotransferase	Gallus gallus		NM_204694	cell division cycle 37 homolog (S. cerevisiae)	Gallus gallus
NM_001006374	thioredoxin domain containing 5 (endoplasmic reticulum)	Gallus gallus		NM_001031227	adaptor-related protein complex 3, mu 1 subunit	Gallus gallus
NM_001008437	DnaJ (Hsp40) homolog, subfamily C, member 3	Gallus gallus		NM_001030997	membrane bound O-acyltransferase domain containing 1	Gallus gallus
NM_001001610	Gal 4	Gallus gallus		NM_001007869	syndecan 4	Gallus gallus
NM_001030895	transmembrane protein 57	Gallus gallus		NM_001030969	Kruppel-like factor 6	Gallus gallus
NM_001079741	chromosome 13 open reading frame 34	Gallus gallus		NM_001031096	additional sex combs like 2 (Drosophila)	Gallus gallus
NM_001006588	hypoxia up-regulated 1	Gallus gallus		NM_204550	dual-specificity tyrosine-(Y)-phosphorylation regulated kinase 1A	Gallus gallus
NM_001031157	phosphatidylinositol 4-kinase type 2 beta	Gallus gallus		NM_001006355	RAB18, member RAS oncogene family	Gallus gallus
NM_001030817	serine/threonine kinase 24 (STE20 homolog, yeast)	Gallus gallus		NM_001006274	cytoskeleton associated protein 2	Gallus gallus
NM_001004398	amphiphysin	Gallus gallus		NM_001171164	poly (ADP-ribose) polymerase family, member 4	Gallus gallus
NM_001031194	vacuolar protein sorting 39 homolog (S. cerevisiae)	Gallus gallus		NM_001030994	engulfment and cell motility 1	Gallus gallus
NM_001006335	SWI/SNF related, matrix associated, actin dependent regulator of chromatin, subfamily e, member 1	Gallus gallus		NM_205261	albumin	Gallus gallus
NM_001142872	RFT1 homolog (S. cerevisiae)	Gallus gallus		NM_001001745	V-set and immunoglobulin domain containing 1	Gallus gallus
NM_205298	TNFAIP3 interacting protein 1	Gallus gallus		NM_001030866	slowmo homolog 2 (Drosophila)	Gallus gallus
NM_001005427	mesenchyme homeobox 2	Gallus gallus		NM_001109784	microsomal triglyceride transfer protein	Gallus gallus
NM_205257	v-ros UR2 sarcoma virus oncogene homolog 1 (avian)	Gallus gallus		NM_001012567	tetratricopeptide repeat domain 27	Gallus gallus
NM_204989	fibrinogen gamma chain	Gallus gallus		NM_001030942	E2F transcription factor 5, p130-binding	Gallus gallus
NM_001007832	poly(A) binding protein interacting protein 2	Gallus gallus		NM_001030892	replication protein A2, 32kDa	Gallus gallus
NM_001165913	similar to Gag-Pol polyprotein	Gallus gallus		NM_001006476	similar to Splicing factor, arginine/serine-rich 5 (Pre-mRNA splicing factor SRP40) (Insulin-induced growth response protein CL-4) (Delayed-early protein HRS)	Gallus gallus
NM_205355	ring finger protein 13	Gallus gallus		NM_001031613	death-associated protein kinase 1	Gallus gallus
NM_001007935	breast cancer metastasis-suppressor 1-like	Gallus gallus		NM_001031218	tetraspanin 14	Gallus gallus
NM_001005836	alanyl-tRNA synthetase	Gallus gallus		NM_001030845	SAM domain and HD domain 1	Gallus gallus
NM_205079	follicle stimulating hormone receptor	Gallus gallus		NM_001039605	protein kinase, AMP-activated, alpha 2 catalytic subunit	Gallus gallus
NM_204733	CD40 ligand (TNF superfamily, member 5, hyper-IgM syndrome)	Gallus gallus		NM_001098854	toll-like receptor 16	Gallus gallus
NM_001006267	arginine and glutamate rich 1	Gallus gallus		NM_205381	cyclin D1	Gallus gallus
NM_001006134	ubiquitin specific peptidase 4 (proto-oncogene)	Gallus gallus		NM_001012813	activating transcription factor 7 interacting protein	Gallus gallus
NM_205234	hippocalcin-like 1	Gallus gallus		NM_001012541	nucleoporin 50kDa	Gallus gallus
NM_205382	thyrotrophic embryonic factor	Gallus gallus		NM_204169	breast cancer 1, early onset	Gallus gallus
NM_001012568	cleavage stimulation factor, 3' pre-RNA, subunit 3, 77kDa	Gallus gallus		NM_001031135	similar to similar to Expressed sequence AI605202; SEC24 family, member B (S. cerevisiae)	Gallus gallus
NM_001030928	kinesin family member 18B	Gallus gallus		NM_204873	tectorin alpha	Gallus gallus
NM_001012860	proteasome (prosome, macropain) subunit, alpha type, 2	Gallus gallus		NM_001008475	peptidylprolyl isomerase (cyclophilin)-like 3	Gallus gallus
NM_001005830	mitogen-activated protein kinase kinase 1	Gallus gallus		NM_001135122	angiopoietin-like 3	Gallus gallus
NM_001031075	RWD domain containing 1	Gallus gallus		NM_205082	topoisomerase (DNA) II beta 180kDa	Gallus gallus
NM_001030942	E2F transcription factor 5, p130-binding	Gallus gallus		NM_001008678	RAB9A, member RAS oncogene family	Gallus gallus
NM_001030679	DENN/MADD domain containing 1A	Gallus gallus		NM_001030337	frizzled homolog 1 (Drosophila)	Gallus gallus
NM_204487	eukaryotic translation initiation factor 2-alpha kinase 2	Gallus gallus		NM_001030723	amyloid beta precursor protein (cytoplasmic tail) binding protein 2	Gallus gallus
NM_205398	tumor protein, translationally-controlled 1	Gallus gallus		NM_001080716	receptor tyrosine kinase-like orphan receptor 2	Gallus gallus
NM_205524	phosphoribosylaminoimidazole carboxylase, phosphoribosylaminoimidazole succinocarboxamide synthetase	Gallus gallus		NM_001030769	complement component 3a receptor 1	Gallus gallus
NM_001031158	similar to similar to SLA/LP autoantigen; Sep (O-phosphoserine) tRNA:Sec (selenocysteine) tRNA synthase	Gallus gallus		NM_001006148	bromodomain containing 8	Gallus gallus
NM_001031218	tetraspanin 14	Gallus gallus		NM_001024832	DNA (cytosine-5-)-methyltransferase 3 alpha	Gallus gallus
NM_001031077	osteopetrosis associated transmembrane protein 1	Gallus gallus		NM_001006560	heterochromatin protein 1, binding protein 3	Gallus gallus
NM_001039289	sorting nexin 14	Gallus gallus		NM_001012587	ribosomal protein S6 kinase, 90kDa, polypeptide 5	Gallus gallus
NM_205326	retinoic acid receptor, beta	Gallus gallus		NM_001006557	selenoprotein T	Gallus gallus
NM_001080869	VAMP (vesicle-associated membrane protein)-associated protein A, 33kDa	Gallus gallus		NM_001079738	hypothetical protein LOC768701	Gallus gallus
NM_001007826	family with sequence similarity 108, member C1	Gallus gallus		NM_204672	synuclein, gamma (breast cancer-specific protein 1)	Gallus gallus
NM_204791	topoisomerase (DNA) II alpha 170kDa	Gallus gallus		NM_001031417	proline-rich coiled-coil 1	Gallus gallus
NM_001012813	activating transcription factor 7 interacting protein	Gallus gallus		NM_001031141	SEC31 homolog A (S. cerevisiae)	Gallus gallus
NM_001012840	pumilio homolog 1 (Drosophila)	Gallus gallus		NM_001031531	ankyrin repeat domain 40	Gallus gallus
NM_001007853	DEAD (Asp-Glu-Ala-Asp) box polypeptide 47	Gallus gallus		NM_001030604	SLIT-ROBO Rho GTPase activating protein 3	Gallus gallus
NM_001031088	tumor suppressing subtransferable candidate 1	Gallus gallus		NM_001006322	ligatin	Gallus gallus
NM_001012541	nucleoporin 50kDa	Gallus gallus		NM_001031596	similar to Cops2 protein; COP9 constitutive photomorphogenic homolog subunit 2 (Arabidopsis)	Gallus gallus
NM_001114972	selenoprotein N, 1	Gallus gallus		NM_001030872	aurora kinase A interacting protein 1	Gallus gallus
NM_205347	plastin 1 (I isoform)	Gallus gallus		NM_001111135	protocadherin alpha 5	Gallus gallus
NM_001030762	thioredoxin reductase 1	Gallus gallus		NM_205320	mature avidin; similar to Avidin-related protein 3	Gallus gallus
NM_001005802	SEC11 homolog A (S. cerevisiae)	Gallus gallus		NM_001030605	interleukin-1 receptor-associated kinase 2	Gallus gallus
NM_204360	EPH receptor A1	Gallus gallus		NM_001007913	potassium channel tetramerisation domain containing 2	Gallus gallus
NM_001030944	RNA binding motif protein 12B	Gallus gallus		NM_204377	casein kinase 1, epsilon	Gallus gallus
NM_001030809	non imprinted in Prader-Willi/Angelman syndrome 2	Gallus gallus		NM_205214	glutamate receptor, ionotrophic, AMPA 4	Gallus gallus
NM_001006451	deoxycytidine kinase	Gallus gallus		NM_001113186	glutamate receptor, ionotrophic, AMPA 4	Gallus gallus
NM_001012801	tubulin folding cofactor D	Gallus gallus		NM_204781	EPH receptor A4	Gallus gallus
NM_001031039	lysocardiolipin acyltransferase	Gallus gallus		NM_001030843	splicing factor, arginine/serine-rich 6	Gallus gallus
NM_001167747	ST6 beta-galactosamide alpha-2,6-sialyltranferase 2	Gallus gallus		NM_204372	similar to arylsulfatase; arylsulfatase family, member H	Gallus gallus
NM_001006454	CCR4-NOT transcription complex, subunit 7	Gallus gallus		NM_001012605	ADP-ribosylation-like factor 6 interacting protein 5	Gallus gallus
NM_001001530	leprecan-like 1	Gallus gallus		NM_001031421	HAUS augmin-like complex, subunit 6; hypothetical LOC427239	Gallus gallus
NM_001030723	amyloid beta precursor protein (cytoplasmic tail) binding protein 2	Gallus gallus		NM_204871	interleukin 6 signal transducer (gp130, oncostatin M receptor)	Gallus gallus
NM_204305	similar to glyceraldehyde 3-phosphate dehydrogenase; glyceraldehyde-3-phosphate dehydrogenase	Gallus gallus		NM_001167719	prostaglandin-endoperoxide synthase 2 (prostaglandin G/H synthase and cyclooxygenase)	Gallus gallus
NM_001079738	hypothetical protein LOC768701	Gallus gallus		NM_001167718	prostaglandin-endoperoxide synthase 2 (prostaglandin G/H synthase and cyclooxygenase)	Gallus gallus
NM_001012536	ras homolog gene family, member G (rho G)	Gallus gallus		NM_204429	chitinase, acidic	Gallus gallus
NM_205077	nuclear receptor subfamily 5, group A, member 1	Gallus gallus		NM_001012911	MAX interactor 1	Gallus gallus
NM_001113710	endothelial differentiation, lysophosphatidic acid G-protein-coupled receptor, 7	Gallus gallus		NM_206859	CCAAT/enhancer binding protein (C/EBP), gamma	Gallus gallus
NM_204105	sidekick 1	Gallus gallus		NM_204648	eukaryotic translation initiation factor 2-alpha kinase 1	Gallus gallus
NM_204577	aldehyde dehydrogenase 1 family, member A1	Gallus gallus		NM_204979	cytochrome P450, family 24, subfamily A, polypeptide 1	Gallus gallus
NM_001048080	RHACD8-4 protein	Gallus gallus		NM_205346	gamma-aminobutyric acid (GABA) A receptor, beta 3	Gallus gallus
NM_001168384	transmembrane protein 16E	Gallus gallus		NM_205086	ferritin, heavy polypeptide 1	Gallus gallus
NM_001030844	chromosome 20 open reading frame 4	Gallus gallus		NM_001030783	discoidin, CUB and LCCL domain containing 2	Gallus gallus
NM_001006508	PMS1 postmeiotic segregation increased 1 (S. cerevisiae)	Gallus gallus		NM_001031502	DnaJ (Hsp40) homolog, subfamily C, member 7	Gallus gallus
NM_001006300	RER1 retention in endoplasmic reticulum 1 homolog (S. cerevisiae)	Gallus gallus		NM_001012883	solute carrier family 25 (mitochondrial carrier, brain), member 14	Gallus gallus
NM_204745	glycine amidinotransferase (L-arginine:glycine amidinotransferase)	Gallus gallus		NM_205535	ATPase, Na+/K+ transporting, beta 3 polypeptide	Gallus gallus
NM_001006420	nuclear receptor binding protein 1	Gallus gallus		NM_001146134	similar to immunoglobulin-like receptor CHIR-AB1; similar to immunoglobulin-like receptor CHIR-B3; immunoglobulin-like receptor CHIR-B3	Gallus gallus
NM_001030565	chromosome 16 open reading frame 70	Gallus gallus		NM_001006203	endothelial differentiation-related factor 1	Gallus gallus
NM_001006349	eukaryotic translation initiation factor 3, subunit E	Gallus gallus		NM_204627	TYRO3 protein tyrosine kinase	Gallus gallus
NM_001031562	hippocampus abundant transcript 1	Gallus gallus		NM_205153	neuron-glia cell adhesion molecule (Ng-CAM)	Gallus gallus
NM_001031265	cell division cycle 73, Paf1/RNA polymerase II complex component, homolog (S. cerevisiae)	Gallus gallus		NM_204553	secreted frizzled-related protein 1	Gallus gallus
NM_213582	C-type lectin domain family 2, member D	Gallus gallus		NM_204156	histone deacetylase 1	Gallus gallus
NM_001012902	AT rich interactive domain 4A (RBP1-like)	Gallus gallus		NM_206976	syntaxin binding protein 1	Gallus gallus
NM_001012858	integrin, alpha 9	Gallus gallus		NM_204914	AQ; similar to AQ	Gallus gallus
NM_001137649	deformed epidermal autoregulatory factor 1 (Drosophila)	Gallus gallus		NM_205037	photoreceptor outer segment membrane glycoprotein	Gallus gallus
NM_205437	capping protein (actin filament) muscle Z-line, beta; similar to capping protein, beta3	Gallus gallus		NM_204722	T-cell, immune regulator 1, ATPase, H+ transporting, lysosomal V0 subunit A3	Gallus gallus
NM_001031111	PDZ domain containing 11	Gallus gallus		NM_204570	core-binding factor, beta subunit	Gallus gallus
NM_204323	leptin receptor	Gallus gallus		NM_001044677	MIS12, MIND kinetochore complex component, homolog (yeast)	Gallus gallus
NM_001031155	sarcoglycan, beta (43kDa dystrophin-associated glycoprotein)	Gallus gallus		NM_001006442	oligosaccharyltransferase complex subunit	Gallus gallus
NM_001012597	ATP-binding cassette, sub-family D (ALD), member 3	Gallus gallus		NM_204830	ELAV (embryonic lethal, abnormal vision, Drosophila)-like 4 (Hu antigen D)	Gallus gallus
NM_205458	synaptosomal-associated protein, 25kDa	Gallus gallus		NM_001031485	WD repeat domain 3; similar to WD repeat domain 3	Gallus gallus
NM_001030964	WD repeat domain 48	Gallus gallus		NM_001031151	methionyl aminopeptidase 1	Gallus gallus
NM_001031499	YOD1 OTU deubiquinating enzyme 1 homolog (S. cerevisiae)	Gallus gallus		NM_001031341	MYST histone acetyltransferase 2	Gallus gallus
NM_204429	chitinase, acidic	Gallus gallus		NM_001030961	myosin IG	Gallus gallus
NM_001012696	phosphoinositide-3-kinase, catalytic, delta polypeptide	Gallus gallus		NM_204605	coagulation factor II (thrombin)	Gallus gallus
NM_001030867	RAB22A, member RAS oncogene family	Gallus gallus		NM_001079739	CD80 molecule	Gallus gallus
NM_204899	potassium voltage-gated channel, shaker-related subfamily, member 4	Gallus gallus		NM_204655	U2 small nuclear RNA auxiliary factor 1	Gallus gallus
NM_204133	aryl hydrocarbon receptor nuclear translocator-like 2	Gallus gallus		NM_001031247	NADH dehydrogenase (ubiquinone) 1 alpha subcomplex, 10, 42kDa	Gallus gallus
NM_001113289	midkine (neurite growth-promoting factor 2)	Gallus gallus		NM_001030541	periostin, osteoblast specific factor	Gallus gallus
NM_204563	DEAD (Asp-Glu-Ala-Asp) box polypeptide 1	Gallus gallus		NM_001031097	RAB10, member RAS oncogene family	Gallus gallus
NM_001006497	DNA2 DNA replication helicase 2-like (yeast)	Gallus gallus		NM_001031301	Sin3A-associated protein, 130kDa	Gallus gallus
NM_001006535	far upstream element (FUSE) binding protein 1	Gallus gallus		NM_204415	cholinergic receptor, nicotinic, alpha 5	Gallus gallus
NM_001006263	trafficking protein particle complex 2	Gallus gallus		NM_001031578	UDP-N-acetyl-alpha-D-galactosamine:polypeptide N-acetylgalactosaminyltransferase 6 (GalNAc-T6)	Gallus gallus
NM_204158	caldesmon 1	Gallus gallus		NM_204658	similar to DNA-dependent protein kinase catalytic subunit; protein kinase, DNA-activated, catalytic polypeptide	Gallus gallus
NM_001030896	Ras-related GTP binding C	Gallus gallus		NM_204833	ELAV (embryonic lethal, abnormal vision, Drosophila)-like 1 (Hu antigen R)	Gallus gallus
NM_204627	TYRO3 protein tyrosine kinase	Gallus gallus		NM_001135677	G1 to S phase transition 1	Gallus gallus
NM_001031363	mediator complex subunit 24	Gallus gallus		NM_001006202	cofactor of BRCA1	Gallus gallus
NM_205153	neuron-glia cell adhesion molecule (Ng-CAM)	Gallus gallus		NM_001012806	vacuolar protein sorting 53 homolog (S. cerevisiae)	Gallus gallus
NM_001079488	dUTP pyrophosphatase	Gallus gallus		NM_001012918	serine/threonine kinase 11 interacting protein	Gallus gallus
NM_001001879	cytochrome P450, family 4, subfamily V, polypeptide 2	Gallus gallus		NM_001018012	aminolevulinate, delta-, synthase 1	Gallus gallus
NM_001004368	kinase insert domain receptor (a type III receptor tyrosine kinase)	Gallus gallus		NM_001012920	protein tyrosine phosphatase-like (proline instead of catalytic arginine), member b	Gallus gallus
NM_001006141	succinate-CoA ligase, GDP-forming, beta subunit	Gallus gallus		NM_001031319	protein kinase C, iota	Gallus gallus
NM_001012942	exportin 7	Gallus gallus		NM_001031123	ubiquitin specific peptidase 12 pseudogene 1	Gallus gallus
NM_204251	basic, immunoglobulin-like variable motif containing	Gallus gallus		NM_213572	solute carrier family 6 (neurotransmitter transporter, serotonin), member 4	Gallus gallus
NM_204607	IKAROS family zinc finger 2 (Helios)	Gallus gallus		NM_001030686	G protein-coupled receptor 107; similar to G protein-coupled receptor 107	Gallus gallus
NM_204570	core-binding factor, beta subunit	Gallus gallus		NM_204355	surfeit 4	Gallus gallus
NM_204830	ELAV (embryonic lethal, abnormal vision, Drosophila)-like 4 (Hu antigen D)	Gallus gallus		NM_205224	ARP2 actin-related protein 2 homolog (yeast)	Gallus gallus
NM_205272	nuclear factor I/B	Gallus gallus		NM_001007087	Bloom syndrome	Gallus gallus
NM_001031179	fatty acyl CoA reductase 1	Gallus gallus		NM_001044685	SIX homeobox 1	Gallus gallus
NM_001031151	methionyl aminopeptidase 1	Gallus gallus		NM_001006302	stromal cell derived factor 4	Gallus gallus
NM_001030950	RAD21 homolog (S. pombe)	Gallus gallus		NM_001006473	ribonuclease/angiogenin inhibitor 1	Gallus gallus
NM_001167737	dynein, cytoplasmic 1, light intermediate chain 1	Gallus gallus		NM_001111126	protocadherin alpha 1	Gallus gallus
NM_001031064	programmed cell death 2	Gallus gallus		NM_206865	popeye domain containing 2	Gallus gallus
NM_001004401	phosphoribosyl pyrophosphate amidotransferase	Gallus gallus		NM_001007086	caveolin 2	Gallus gallus
NM_001004765	aquaporin 4	Gallus gallus		NM_001030549	mitogen-activated protein kinase 6; similar to Mapk6 protein	Gallus gallus
NM_001079739	CD80 molecule	Gallus gallus		NM_001006461	leucine zipper-EF-hand containing transmembrane protein 1	Gallus gallus
NM_001006414	F-box protein 9	Gallus gallus		NM_001007841	chromosome 12 open reading frame 49	Gallus gallus
NM_001031247	NADH dehydrogenase (ubiquinone) 1 alpha subcomplex, 10, 42kDa	Gallus gallus		NM_204442	coagulation factor VII (serum prothrombin conversion accelerator)	Gallus gallus
NM_204478	NUF2, NDC80 kinetochore complex component, homolog (S. cerevisiae)	Gallus gallus		NM_205319	fibroblast growth factor receptor 2	Gallus gallus
NM_001039273	phospholipase C, zeta 1	Gallus gallus		NM_001012867	transmembrane protein 183B	Gallus gallus
NM_001012940	similar to N-acetyltransferase 10; N-acetyltransferase 10; hypothetical LOC426150	Gallus gallus		NM_001031053	prolyl endopeptidase-like	Gallus gallus
NM_001048007	COP9 constitutive photomorphogenic homolog subunit 8 (Arabidopsis)	Gallus gallus		NM_205045	tyrosinase-related protein 1	Gallus gallus
NM_205217	ST3 beta-galactoside alpha-2,3-sialyltransferase 1	Gallus gallus		NM_001001294	insulin-like growth factor binding protein 1	Gallus gallus
NM_204658	similar to DNA-dependent protein kinase catalytic subunit; protein kinase, DNA-activated, catalytic polypeptide	Gallus gallus		NM_001144973	receptor (G protein-coupled) activity modifying protein 3	Gallus gallus
NM_001006163	COP9 constitutive photomorphogenic homolog subunit 3 (Arabidopsis)	Gallus gallus		NM_205340	N-acetyltransferase, pineal gland isozyme NAT-10	Gallus gallus
NM_001031352	pyruvate dehydrogenase kinase, isozyme 1; hypothetical LOC425178	Gallus gallus		NM_204565	LZ1	Gallus gallus
NM_204851	spondin 1, extracellular matrix protein	Gallus gallus		NM_001115079	agouti signaling protein, nonagouti homolog (mouse)	Gallus gallus
NM_001006453	N-acylsphingosine amidohydrolase (acid ceramidase) 1	Gallus gallus		NM_001012873	KLRAQ motif containing 1	Gallus gallus
NM_001025354	polymerase (DNA directed), epsilon 3 (p17 subunit)	Gallus gallus		NM_204573	cgABP260	Gallus gallus
NM_001030807	CTP synthase II	Gallus gallus		NM_001097531	zinc finger protein 706	Gallus gallus
NM_205096	high density lipoprotein binding protein (vigilin)	Gallus gallus		NM_001031120	highly divergent homeobox	Gallus gallus
NM_001030686	G protein-coupled receptor 107; similar to G protein-coupled receptor 107	Gallus gallus		NM_001001464	peroxisome proliferator-activated receptor alpha	Gallus gallus
NM_001006285	ubiquinol-cytochrome c reductase complex chaperone, CBP3 homolog (yeast)	Gallus gallus		NM_001008458	brain and reproductive organ-expressed (TNFRSF1A modulator)	Gallus gallus
NM_205244	cyclin A2	Gallus gallus		NM_001031356	pleckstrin homology domain containing, family O member 1	Gallus gallus
NM_001030597	coatomer protein complex, subunit gamma	Gallus gallus		NM_001030853	serine/threonine kinase 4	Gallus gallus
NM_001031430	spleen tyrosine kinase	Gallus gallus		NM_204544	female expressed transcript 1	Gallus gallus
NM_001006473	ribonuclease/angiogenin inhibitor 1	Gallus gallus		NM_001012538	solute carrier family 37 (glycerol-3-phosphate transporter), member 3	Gallus gallus
NM_001007086	caveolin 2	Gallus gallus		NM_001012692	chromosome 20 open reading frame 7	Gallus gallus
NM_204453	similar to TBX15 protein; T-box 18	Gallus gallus		NM_001006211	Shwachman-Bodian-Diamond syndrome	Gallus gallus
NM_001012880	primase, DNA, polypeptide 2 (58kDa)	Gallus gallus		NM_213584	RAD17 homolog (S. pombe)	Gallus gallus
NM_204548	homeobox A3	Gallus gallus		NM_204517	structural maintenance of chromosomes 3	Gallus gallus
NM_001006461	leucine zipper-EF-hand containing transmembrane protein 1	Gallus gallus		NM_001030568	acyltransferase like 1	Gallus gallus
NM_001030870	NAD kinase	Gallus gallus		NM_001006294	TH1-like (Drosophila)	Gallus gallus
NM_204439	tumor necrosis factor receptor superfamily, member 1B	Gallus gallus		NM_001006182	similar to septin 2	Gallus gallus
NM_001012848	transmembrane protein 70	Gallus gallus		NM_001031174	resistance to inhibitors of cholinesterase 8 homolog A (C. elegans)	Gallus gallus
NM_001031547	APAF1 interacting protein	Gallus gallus		NM_001044695	SIX homeobox 2	Gallus gallus
NM_001037829	EF-hand domain (C-terminal) containing 2	Gallus gallus		NM_001030629	poly(A)-specific ribonuclease (deadenylation nuclease)	Gallus gallus
NM_205045	tyrosinase-related protein 1	Gallus gallus		NM_204146	integrin, alpha 3 (antigen CD49C, alpha 3 subunit of VLA-3 receptor)	Gallus gallus
NM_001031573	armadillo repeat containing 1	Gallus gallus		NM_001031379	small glutamine-rich tetratricopeptide repeat (TPR)-containing, alpha	Gallus gallus
NM_001001294	insulin-like growth factor binding protein 1	Gallus gallus		NM_001006563	chromosome 12 open reading frame 32	Gallus gallus
NM_001031539	ELOVL family member 6, elongation of long chain fatty acids (FEN1/Elo2, SUR4/Elo3-like, yeast)	Gallus gallus		NM_001038652	cannabinoid receptor 1 (brain)	Gallus gallus
NM_001024826	SMAD family member 9	Gallus gallus		NM_001031132	protein kinase-like protein SgK196	Gallus gallus
NM_001031224	DnaJ (Hsp40) homolog, subfamily B, member 12	Gallus gallus		NM_001031285	basic transcription factor 3-like 4	Gallus gallus
NM_204390	sphingomyelin synthase 1	Gallus gallus		NM_001080892	chromatin modifying protein 2A	Gallus gallus
NM_001030727	dihydrolipoamide dehydrogenase	Gallus gallus		NM_001081709	toll-like receptor 6	Gallus gallus
NM_001025609	DnaJ (Hsp40) homolog, subfamily C, member 18	Gallus gallus		NM_001006448	polymerase (RNA) II (DNA directed) polypeptide B, 140kDa	Gallus gallus
NM_204565	LZ1	Gallus gallus		NM_204601	sulfotransferase family, cytosolic, 1C, member 3	Gallus gallus
NM_001012803	serine carboxypeptidase 1	Gallus gallus		NM_001031211	BCL2-associated athanogene 5	Gallus gallus
NM_205134	nuclear factor of kappa light polypeptide gene enhancer in B-cells 1	Gallus gallus		NM_204905	pterin-4 alpha-carbinolamine dehydratase/dimerization cofactor of hepatocyte nuclear factor 1 alpha (TCF1)	Gallus gallus
NM_001012892	succinate-CoA ligase, GDP-forming, alpha subunit	Gallus gallus		NM_001012826	fibronectin type III domain containing 3A	Gallus gallus
NM_001001302	myosin, heavy chain 7, cardiac muscle, beta; similar to slow myosin heavy chain 3	Gallus gallus		NM_204103	adducin 3 (gamma)	Gallus gallus
NM_001031021	transmembrane protein 68	Gallus gallus		NM_001030365	v-erb-a erythroblastic leukemia viral oncogene homolog 4	Gallus gallus
NM_001008676	interferon gamma receptor 2 (interferon gamma transducer 1)	Gallus gallus		NM_001031092	lysosomal-associated protein transmembrane 4 alpha	Gallus gallus
NM_001010841	neuronal guanine nucleotide exchange factor	Gallus gallus		NM_205179	activated leukocyte cell adhesion molecule	Gallus gallus
NM_001030909	ATPase, H+/K+ transporting, nongastric, alpha polypeptide	Gallus gallus		NM_001006276	replication factor C (activator 1) 3, 38kDa	Gallus gallus
NM_205122	protein phosphatase 1, catalytic subunit, beta isoform	Gallus gallus		NM_001080861	eukaryotic translation initiation factor 4H	Gallus gallus
NM_204557	embigin homolog (mouse)	Gallus gallus		NM_001006235	thymopoietin	Gallus gallus
NM_001031469	strawberry notch homolog 1 (Drosophila)	Gallus gallus		NM_001080117	clathrin, heavy chain (Hc)	Gallus gallus
NM_001031355	family with sequence similarity 125, member A	Gallus gallus		NM_001006490	nudix (nucleoside diphosphate linked moiety X)-type motif 14	Gallus gallus
NM_204210	diaphanous homolog 1 (Drosophila)	Gallus gallus		NM_204986	phosphodiesterase 6C, cGMP-specific, cone, alpha prime	Gallus gallus
NM_001030751	SCY1-like 2 (S. cerevisiae)	Gallus gallus		NM_204328	forkhead box O1A	Gallus gallus
NM_204409	tumor necrosis factor (ligand) superfamily, member 8	Gallus gallus		NM_204329	K(lysine) acetyltransferase 2A	Gallus gallus
NM_204356	TIA1 cytotoxic granule-associated RNA binding protein-like 1	Gallus gallus		NM_205389	deoxynucleotidyltransferase, terminal	Gallus gallus
NM_204943	hydroxysteroid (17-beta) dehydrogenase 4	Gallus gallus		NM_001006198	WD repeat domain 5	Gallus gallus
NM_204742	makorin ring finger protein 1	Gallus gallus		NM_001146142	nanog homeobox	Gallus gallus
NM_001030982	cell division cycle associated 7-like	Gallus gallus		NM_001006581	RIO kinase 2 (yeast)	Gallus gallus
NM_204554	WAP four-disulfide core domain 1; similar to PS20 protein	Gallus gallus		NM_001012872	pellino homolog 1 (Drosophila)	Gallus gallus
NM_204908	similar to BASH; B-cell linker	Gallus gallus		NM_001008456	galectin-related protein	Gallus gallus
NM_204882	group-specific component (vitamin D binding protein)	Gallus gallus		NM_001004410	similar to phosphoinositide 3-kinase catalytic subunit; similar to Phosphatidylinositol 3-kinase, catalytic, alpha polypeptide; phosphoinositide-3-kinase, catalytic, alpha polypeptide	Gallus gallus
NM_204114	deiodinase, iodothyronine, type II	Gallus gallus		NM_001031415	arylsulfatase family, member K	Gallus gallus
NM_204176	keratocan	Gallus gallus		NM_001001129	cytochrome P450, family 26, subfamily A, polypeptide 1	Gallus gallus
NM_001130740	patatin-like phospholipase domain containing 4; similar to Patatin-like phospholipase domain containing 4	Gallus gallus		NM_001031380	similar to Olfr365 protein; poly-U binding splicing factor 60KDa	Gallus gallus
NM_204632	pol-like protein ENS-3	Gallus gallus		NM_001032398	eukaryotic translation elongation factor 1 alpha 2	Gallus gallus
NM_001031323	eukaryotic translation initiation factor 2A, 65kDa	Gallus gallus		NM_001030570	Nedd4 binding protein 1	Gallus gallus
NM_001030846	KIAA1219	Gallus gallus		NM_001008459	BTB (POZ) domain containing 9	Gallus gallus
NM_205323	actinin, alpha 2; similar to alpha-actinin	Gallus gallus		NM_001012934	proteasome (prosome, macropain) 26S subunit, non-ATPase, 2	Gallus gallus
NM_001004408	tetra-peptide repeat homeobox-like	Gallus gallus		NM_204843	RAP1 GTPase activating protein	Gallus gallus
NM_001006538	DPH2 homolog (S. cerevisiae)	Gallus gallus		NM_001164536	early B-cell factor 2	Gallus gallus
NM_001006448	polymerase (RNA) II (DNA directed) polypeptide B, 140kDa	Gallus gallus		NM_001006516	basic leucine zipper and W2 domains 1	Gallus gallus
NM_001081709	toll-like receptor 6	Gallus gallus		NM_204995	aldehyde dehydrogenase 1 family, member A2	Gallus gallus
NM_001030770	serine/threonine kinase 38 like	Gallus gallus		NM_001012844	STE20-related kinase adaptor alpha	Gallus gallus
NM_001030854	chromosome 20 open reading frame 121	Gallus gallus		NM_205074	syntaxin1B	Gallus gallus
NM_001031211	BCL2-associated athanogene 5	Gallus gallus		NM_001143931	two-pore calcium channel 3	Gallus gallus
NM_001004391	cadherin 4, type 1, R-cadherin (retinal)	Gallus gallus		NM_001077234	TSC22 domain family, member 3	Gallus gallus
NM_001031297	zinc finger, RAN-binding domain containing 2	Gallus gallus		NM_001114623	FIG4 homolog (S. cerevisiae)	Gallus gallus
NM_001031402	histone deacetylase 7A	Gallus gallus		NM_001031018	ubiquitin-conjugating enzyme E2 variant 2	Gallus gallus
NM_001030553	fem-1 homolog b (C. elegans)	Gallus gallus		NM_001080211	cartilage acidic protein 1	Gallus gallus
NM_001030987	homeobox A6	Gallus gallus		NM_001030930	MAX-like protein X	Gallus gallus
NM_205179	activated leukocyte cell adhesion molecule	Gallus gallus		NM_001030663	hydrogen voltage-gated channel 1	Gallus gallus
NM_001006235	thymopoietin	Gallus gallus		NM_204288	makorin, ring finger protein, 2	Gallus gallus
NM_001080861	eukaryotic translation initiation factor 4H	Gallus gallus		NM_001006567	hypothetical LOC426431; ornithine aminotransferase	Gallus gallus
NM_001012405	EDAR-associated death domain	Gallus gallus		NM_001012842	BSD domain containing 1	Gallus gallus
NM_001012608	coagulation factor II (thrombin) receptor-like 1	Gallus gallus		NM_205040	DGCR6 homolog	Gallus gallus
NM_001012532	euchromatic histone-lysine N-methyltransferase 1	Gallus gallus		NM_001030905	transcription elongation factor B (SIII), polypeptide 3 (110kDa, elongin A)	Gallus gallus
NM_001128062	galanin receptor 1	Gallus gallus		NM_204300	enabled homolog (Drosophila)	Gallus gallus
NM_204371	gap junction protein, beta 1, 32kDa	Gallus gallus		NM_001163800	RAB3 GTPase activating protein subunit 2 (non-catalytic)	Gallus gallus
NM_001006166	transducin (beta)-like 3	Gallus gallus		NM_001012592	heterogeneous nuclear ribonucleoprotein H3 (2H9)	Gallus gallus
NM_001012914	signal transducer and activator of transcription 1, 91kDa; signal transducer and activator of transcription 4	Gallus gallus		NM_001031122	cysteine-rich hydrophobic domain 1	Gallus gallus
NM_001012564	tumor-associated calcium signal transducer 1	Gallus gallus		NM_204303	malic enzyme 1, NADP(+)-dependent, cytosolic	Gallus gallus
NM_204970	insulin-like growth factor 2 receptor	Gallus gallus		NM_001039294	farnesyl-diphosphate farnesyltransferase 1	Gallus gallus
NM_001039305	meningioma expressed antigen 5 (hyaluronidase)	Gallus gallus		NM_001006296	VAMP (vesicle-associated membrane protein)-associated protein B and C	Gallus gallus
NM_001006208	ras homolog gene family, member T1	Gallus gallus		NM_001004409	transient receptor potential cation channel, subfamily C, member 1	Gallus gallus
NM_205486	high-mobility group box 2	Gallus gallus		NM_001007829	small nuclear RNA activating complex, polypeptide 5, 19kDa	Gallus gallus
NM_001031380	similar to Olfr365 protein; poly-U binding splicing factor 60KDa	Gallus gallus		NM_001012889	ring finger protein 4	Gallus gallus
NM_001097536	signal recognition particle 9kDa	Gallus gallus		NM_001171677	ribosomal protein L29	Gallus gallus
NM_001001748	cytochrome b5 type A (microsomal)	Gallus gallus		NM_001079761	BRCA1 associated protein	Gallus gallus
NM_001030765	cholinergic receptor, muscarinic 2	Gallus gallus		NM_001006387	transcription elongation factor A (SII), 1	Gallus gallus
NM_001111131	cadherin-related neuronal receptor c02	Gallus gallus		NM_205017	ras-related C3 botulinum toxin substrate 3 (rho family, small GTP binding protein Rac3); ras-related C3 botulinum toxin substrate 1 (rho family, small GTP binding protein Rac1)	Gallus gallus
NM_204368	tRNA methyltransferase 11 homolog (S. cerevisiae)	Gallus gallus		NM_001006534	SH3-domain GRB2-like endophilin B1	Gallus gallus
NM_204645	centromere protein F, 350/400ka (mitosin)	Gallus gallus		NM_001012607	sorting nexin 2	Gallus gallus
NM_204332	similar to chromobox homolog 1 (HP1 beta homolog Drosophila ); chromobox homolog 1 (HP1 beta homolog Drosophila )	Gallus gallus		NM_204587	myosin, heavy chain 7B, cardiac muscle, beta	Gallus gallus
NM_001031066	chromosome 11 open reading frame 46	Gallus gallus		NM_001030744	KRR1, small subunit (SSU) processome component, homolog (yeast)	Gallus gallus
NM_001008459	BTB (POZ) domain containing 9	Gallus gallus		NM_205519	ATPase, Ca++ transporting, cardiac muscle, fast twitch 1	Gallus gallus
NM_001160324	neurofascin	Gallus gallus		NM_001006241	ribosomal protein L3; similar to ribosomal protein L3	Gallus gallus
NM_001004493	neurofascin	Gallus gallus		NM_001031041	tRNA methyltransferase 6 homolog (S. cerevisiae)	Gallus gallus
NM_001004709	neurofascin	Gallus gallus		NM_001105675	malignant T cell amplified sequence 1	Gallus gallus
NM_001160320	neurofascin	Gallus gallus		NM_001012938	similar to zinc finger CCCH-type, antiviral 1; zinc finger CCCH-type, antiviral 1	Gallus gallus
NM_001160323	neurofascin	Gallus gallus		NM_001033941	Fanconi anemia, complementation group L	Gallus gallus
NM_001160321	neurofascin	Gallus gallus		NM_001031357	loss of heterozygosity, 12, chromosomal region 1	Gallus gallus
NM_205132	bone morphogenetic protein receptor, type IB	Gallus gallus		NM_205485	interleukin 1 receptor, type I	Gallus gallus
NM_204474	similar to type IIb sodium phosphate cotransporter; solute carrier family 34 (sodium phosphate), member 2	Gallus gallus		NM_001006385	CNDP dipeptidase 2 (metallopeptidase M20 family)	Gallus gallus
NM_204844	G protein regulated inducer of neurite outgrowth 2	Gallus gallus		NM_001030768	2,3-bisphosphoglycerate mutase	Gallus gallus
NM_204995	aldehyde dehydrogenase 1 family, member A2	Gallus gallus		NM_001135678	ankyrin repeat domain 27 (VPS9 domain)	Gallus gallus
NM_001012844	STE20-related kinase adaptor alpha	Gallus gallus		NM_001006556	guanine monphosphate synthetase	Gallus gallus
NM_001007850	YY1 associated factor 2	Gallus gallus		NM_001031216	retinal G protein coupled receptor	Gallus gallus
NM_001031043	acyl-Coenzyme A binding domain containing 3	Gallus gallus		NM_001031264	NIMA (never in mitosis gene a)-related kinase 7	Gallus gallus
NM_204806	hyaluronan synthase 2	Gallus gallus		NM_001045827	protocadherin 1	Gallus gallus
NM_001101829	NADPH oxidase 4	Gallus gallus		NM_204464	Rh-associated glycoprotein	Gallus gallus
NM_001007840	ring finger protein 185	Gallus gallus		NM_001012879	transmembrane protein 30A	Gallus gallus
NM_001006129	amyloid beta precursor protein binding protein 1	Gallus gallus		NM_204886	myotrophin	Gallus gallus
NM_001006403	translin-associated factor X	Gallus gallus		NM_001030680	spermatid perinuclear RNA binding protein	Gallus gallus
NM_001001292	epidermal growth factor (beta-urogastrone)	Gallus gallus		NM_001031434	ring finger protein 20	Gallus gallus
NM_001114623	FIG4 homolog (S. cerevisiae)	Gallus gallus		NM_001030945	cyclin E2	Gallus gallus
NM_204118	aryl hydrocarbon receptor	Gallus gallus		NM_001110059	thyroid adenoma associated; hypothetical protein LOC771590	Gallus gallus
NM_204369	high mobility group AT-hook 1	Gallus gallus		NM_001031468	phosphomannomutase 2	Gallus gallus
NM_204450	cAMP responsive element binding protein 1	Gallus gallus		NM_001142849	dopamine receptor D4	Gallus gallus
NM_001031071	G protein-coupled receptor 126	Gallus gallus		NM_001030946	tumor protein p53 inducible nuclear protein 1	Gallus gallus
NM_001031440	nuclear cap binding protein subunit 1, 80kDa	Gallus gallus		NM_001006526	SEC22 vesicle trafficking protein homolog A (S. cerevisiae)	Gallus gallus
NM_001006247	serine/threonine kinase receptor associated protein	Gallus gallus		NM_001008440	lymphocyte cytosolic protein 1 (L-plastin)	Gallus gallus
NM_001031480	dual-specificity tyrosine-(Y)-phosphorylation regulated kinase 2	Gallus gallus		NM_204578	carboxypeptidase Z; similar to carboxypeptidase Z	Gallus gallus
NM_001031263	WD repeat, sterile alpha motif and U-box domain containing 1	Gallus gallus		NM_001012811	CCR4-NOT transcription complex, subunit 4	Gallus gallus
NM_001006379	ribonuclease III, nuclear	Gallus gallus		NM_001012573	muscleblind-like 3 (Drosophila)	Gallus gallus
NM_001112799	glutamate receptor, ionotrophic, AMPA 3	Gallus gallus		NM_001163341	muscleblind-like 3 (Drosophila)	Gallus gallus
NM_205215	glutamate receptor, ionotrophic, AMPA 3	Gallus gallus		NM_001163340	muscleblind-like 3 (Drosophila)	Gallus gallus
NM_001006317	nuclear factor related to kappaB binding protein	Gallus gallus		NM_001163342	muscleblind-like 3 (Drosophila)	Gallus gallus
NM_001142255	ADP-ribosyltransferase 4 (Dombrock blood group)	Gallus gallus		NM_001163338	muscleblind-like 3 (Drosophila)	Gallus gallus
NM_001030905	transcription elongation factor B (SIII), polypeptide 3 (110kDa, elongin A)	Gallus gallus		NM_001163339	muscleblind-like 3 (Drosophila)	Gallus gallus
NM_204300	enabled homolog (Drosophila)	Gallus gallus		NM_001079756	leucine rich repeat containing 45	Gallus gallus
NM_001163374	muscleblind-like 2 (Drosophila)	Gallus gallus		NM_001031318	DCN1, defective in cullin neddylation 1, domain containing 1 (S. cerevisiae)	Gallus gallus
NM_001163371	muscleblind-like 2 (Drosophila)	Gallus gallus		NM_001006558	glycogenin 1	Gallus gallus
NM_001163372	muscleblind-like 2 (Drosophila)	Gallus gallus		NM_205029	similar to Mitf; microphthalmia-associated transcription factor	Gallus gallus
NM_001163376	muscleblind-like 2 (Drosophila)	Gallus gallus		NM_001167759	RAD52 homolog (S. cerevisiae)	Gallus gallus
NM_001163373	muscleblind-like 2 (Drosophila)	Gallus gallus		NM_001167758	RAD52 homolog (S. cerevisiae)	Gallus gallus
NM_001163375	muscleblind-like 2 (Drosophila)	Gallus gallus		NM_001167764	similar to Heat shock factor protein 2 (HSF 2) (Heat shock transcription factor 2) (HSTF 2) (HSF 3B) (HSTF 3B); heat shock transcription factor 2	Gallus gallus
NM_001081700	muscleblind-like 2 (Drosophila)	Gallus gallus		NM_001008681	abhydrolase domain containing 13	Gallus gallus
NM_204334	peptidase inhibitor 15	Gallus gallus		NM_204637	ARP6 actin-related protein 6 homolog (yeast)	Gallus gallus
NM_001030728	nicotinamide phosphoribosyltransferase	Gallus gallus		NM_001031451	FYN binding protein (FYB-120/130)	Gallus gallus
NM_001163800	RAB3 GTPase activating protein subunit 2 (non-catalytic)	Gallus gallus		NM_001012701	activating signal cointegrator 1 complex subunit 3-like 1	Gallus gallus
NM_001012588	inositol 1,3,4-triphosphate 5/6 kinase	Gallus gallus		NM_205273	nuclear factor I/A	Gallus gallus
NM_205177	cathepsin D	Gallus gallus		NM_001006180	ubiquitin-conjugating enzyme E2L 3	Gallus gallus
NM_204800	sprouty homolog 2 (Drosophila)	Gallus gallus		NM_001007963	karyopherin alpha 4 (importin alpha 3)	Gallus gallus
NM_001031122	cysteine-rich hydrophobic domain 1	Gallus gallus		NM_001031047	angel homolog 2 (Drosophila)	Gallus gallus
NM_001031125	septin 6	Gallus gallus		NM_001079487	cerebellin 4 precursor	Gallus gallus
NM_001038496	eukaryotic translation initiation factor 5B	Gallus gallus		NM_204219	TNF receptor-associated factor 5	Gallus gallus
NM_001079730	adducin 1 (alpha)	Gallus gallus		NM_001030752	WD repeat domain 91	Gallus gallus
NM_204311	caudal type homeobox 2	Gallus gallus		NM_001030053	mitochondrial ribosomal protein L48	Gallus gallus
NM_204531	pericentriolar material 1	Gallus gallus		NM_001006522	peroxisomal trans-2-enoyl-CoA reductase	Gallus gallus
NM_204737	chromosome 21 open reading frame 91	Gallus gallus		NM_001044633	apolipoprotein B (including Ag(x) antigen)	Gallus gallus
NM_213576	zona pellucida protein D	Gallus gallus		NM_205395	sarcolemma associated protein	Gallus gallus
NM_001012847	elongation factor RNA polymerase II	Gallus gallus		NM_001030685	protein-O-mannosyltransferase 1	Gallus gallus
NM_001007858	GA binding protein transcription factor, alpha subunit 60kDa	Gallus gallus		NM_204403	BUB1 budding uninhibited by benzimidazoles 1 homolog beta (yeast)	Gallus gallus
NM_205181	stathmin-like 2	Gallus gallus		NM_001007488	toll-like receptor 6	Gallus gallus
NM_001012889	ring finger protein 4	Gallus gallus		NM_001031604	methylthioadenosine phosphorylase	Gallus gallus
NM_206983	phospholipase A2 receptor 1, 180kDa	Gallus gallus		NM_001031130	neuropeptide Y receptor Y5	Gallus gallus
NM_001006264	phosphoribosyl pyrophosphate synthetase 2	Gallus gallus		NM_001030848	eukaryotic translation initiation factor 6	Gallus gallus
NM_204338	growth differentiation factor 5	Gallus gallus		NM_001030578	kelch domain containing 4; similar to kelch domain containing 4	Gallus gallus
NM_001031144	coiled-coil domain containing 98	Gallus gallus		NM_205435	PTK2 protein tyrosine kinase 2	Gallus gallus
NM_001007873	spermatogenesis associated 2	Gallus gallus		NM_204204	UDP glycosyltransferase 8	Gallus gallus
NM_001001615	cadherin 2, type 1, N-cadherin (neuronal)	Gallus gallus		NM_001006559	mitogen-activated protein kinase kinase 1 interacting protein 1	Gallus gallus
NM_205391	chromosome 5 open reading frame 13	Gallus gallus		NM_001080862	non-SMC condensin I complex, subunit D2	Gallus gallus
NM_001030340	protein phosphatase 3 (formerly 2B), catalytic subunit, beta isoform	Gallus gallus		NM_204823	cerberus 1, cysteine knot superfamily, homolog (Xenopus laevis)	Gallus gallus
NM_001040465	Dicer1, Dcr-1 homolog (Drosophila)	Gallus gallus		NM_204588	X-linked inhibitor of apoptosis	Gallus gallus
NM_205050	2',3'-cyclic nucleotide 3' phosphodiesterase	Gallus gallus		NM_001031378	similar to BC027088 protein	Gallus gallus
NM_001006519	similar to dynein, cytoplasmic, intermediate polypeptide 2; dynein, cytoplasmic 1, intermediate chain 2	Gallus gallus		NM_001159425	similar to RNA polymerase transcriptional regulation mediator, subunit 6 homolog (Activator-recruited cofactor 33 kDa component) (ARC33) (NY-REN-28 antigen); mediator complex subunit 6	Gallus gallus
NM_205205	nuclear receptor subfamily 1, group D, member 2	Gallus gallus		NM_001004412	membrane metallo-endopeptidase	Gallus gallus
NM_001012607	sorting nexin 2	Gallus gallus		NM_205240	ST6 (alpha-N-acetyl-neuraminyl-2,3-beta-galactosyl-1,3)-N-acetylgalactosaminide alpha-2,6-sialyltransferase 1	Gallus gallus
NM_001030960	kelch-like 18 (Drosophila)	Gallus gallus		NM_204959	myomesin 1, 185kDa	Gallus gallus
NM_001012601	fragile X mental retardation, autosomal homolog 1; similar to fragile X mental retardation, autosomal homolog 1	Gallus gallus		NM_001030767	cat eye syndrome chromosome region, candidate 1	Gallus gallus
NM_204787	versican	Gallus gallus		NM_001030547	adenosine deaminase-like; TM2 domain containing 3	Gallus gallus
NM_205519	ATPase, Ca++ transporting, cardiac muscle, fast twitch 1	Gallus gallus		NM_205174	SKI-like oncogene	Gallus gallus
NM_205197	matrix metallopeptidase 16 (membrane-inserted)	Gallus gallus		NM_001030748	CASP2 and RIPK1 domain containing adaptor with death domain	Gallus gallus
NM_001105675	malignant T cell amplified sequence 1	Gallus gallus		NM_001006492	actin-related protein 10 homolog (S. cerevisiae)	Gallus gallus
NM_001006470	tumor suppressing subtransferable candidate 4	Gallus gallus		NM_001038693	phosphoglucomutase 1	Gallus gallus
NM_001006518	NADH dehydrogenase (ubiquinone) Fe-S protein 1, 75kDa (NADH-coenzyme Q reductase)	Gallus gallus		NM_001142847	sentan, cilia apical structure protein	Gallus gallus
NM_001006215	ligase III, DNA, ATP-dependent	Gallus gallus		NM_001044684	Sp5 transcription factor	Gallus gallus
NM_205089	protein kinase C and casein kinase substrate in neurons 2	Gallus gallus		NM_001030603	RAD18 homolog (S. cerevisiae)	Gallus gallus
NM_205292	v-Ha-ras Harvey rat sarcoma viral oncogene homolog	Gallus gallus		NM_001030933	signal peptide peptidase-like 2B	Gallus gallus
NM_205297	signal peptidase complex subunit 3 homolog (S. cerevisiae)	Gallus gallus		NM_001031514	melanocortin 4 receptor	Gallus gallus
NM_205485	interleukin 1 receptor, type I	Gallus gallus		NM_204289	heat shock protein 90kDa beta (Grp94), member 1	Gallus gallus
NM_001079758	transmembrane protein 38A	Gallus gallus		NM_204130	similar to putative Zn-finger protein C47L; zinc finger protein 622	Gallus gallus
NM_001031570	insulin receptor substrate 1	Gallus gallus		NM_204480	ST3 beta-galactoside alpha-2,3-sialyltransferase 2	Gallus gallus
NM_205522	solute carrier family 4, anion exchanger, member 1	Gallus gallus		NM_001031329	kelch-like 20 (Drosophila); similar to similar to RIKEN cDNA D930050H05	Gallus gallus
NM_001030985	heterogeneous nuclear ribonucleoprotein A2/B1	Gallus gallus		NM_001012870	BUB1 budding uninhibited by benzimidazoles 1 homolog (yeast)	Gallus gallus
NM_001130387	interferon gamma receptor 1	Gallus gallus		NM_001031180	SWAP switching B-cell complex 70kDa subunit	Gallus gallus
NM_001030704	monocyte to macrophage differentiation-associated	Gallus gallus		NM_205343	acetylserotonin O-methyltransferase	Gallus gallus
NM_001007082	transient receptor potential cation channel, subfamily M, member 8	Gallus gallus		NM_001005816	GA binding protein transcription factor, beta subunit 2	Gallus gallus
NM_205034	calcium channel, voltage-dependent, L type, alpha 1D subunit	Gallus gallus		NM_204284	similar to neuropilin-2a1 receptor; neuropilin 2	Gallus gallus
NM_001031264	NIMA (never in mitosis gene a)-related kinase 7	Gallus gallus		NM_001007988	BMI1 polycomb ring finger oncogene	Gallus gallus
NM_001079749	Ellis van Creveld syndrome 2 (limbin)	Gallus gallus		NM_001111138	protocadherin alpha 8	Gallus gallus
NM_206951	EPH receptor B2	Gallus gallus		NM_001033644	otoconin 90	Gallus gallus
NM_001128665	G protein-coupled receptor 151	Gallus gallus		NM_205055	v-akt murine thymoma viral oncogene homolog 1	Gallus gallus
NM_001031389	regulatory factor X-associated ankyrin-containing protein; hypothetical LOC426688; similar to similar to regulatory factor X-associated ankyrin-containing protein isoform a; ankyrin repeat-containing regulatory factor X-associated protein; regulatory factor X subunit B; DNA-binding protein RFXANK; RFX-Bdelta4	Gallus gallus		NM_204811	prosaposin	Gallus gallus
NM_001024691	pygopus homolog 1 (Drosophila); similar to pygopus homolog 1 (Drosophila)	Gallus gallus		NM_204975	kinesin family member 4A	Gallus gallus
NM_204502	similar to follistatin-like 4; follistatin-like 4	Gallus gallus		NM_001079729	zinc finger and BTB domain containing 33	Gallus gallus
NM_204464	Rh-associated glycoprotein	Gallus gallus		NM_001001467	transducer of ERBB2, 1	Gallus gallus
NM_205364	cholinergic receptor, nicotinic, alpha 6	Gallus gallus		NM_001112806	CDC28 protein kinase regulatory subunit 1B	Gallus gallus
NM_001012575	trimethyllysine hydroxylase, epsilon	Gallus gallus		NM_001012611	ectodysplasin A receptor	Gallus gallus
NM_001012576	heat shock 70kDa protein 4-like	Gallus gallus		NM_001099356	similar to FKSG11	Gallus gallus
NM_001079733	arginyltransferase 1	Gallus gallus		NM_001012807	transcriptional adaptor 2 (ADA2 homolog, yeast)-like	Gallus gallus
NM_001031483	solute carrier family 41, member 2	Gallus gallus		NM_001030792	chromatin modifying protein 2B	Gallus gallus
NM_001079726	acetyl-Coenzyme A acyltransferase 1	Gallus gallus		NM_001030931	signal transducer and activator of transcription 3 (acute-phase response factor)	Gallus gallus
NM_001110059	thyroid adenoma associated; hypothetical protein LOC771590	Gallus gallus		NM_204357	NADH dehydrogenase (ubiquinone) 1 beta subcomplex, 1, 7kDa; ataxin 3	Gallus gallus
NM_001006409	ATG5 autophagy related 5 homolog (S. cerevisiae)	Gallus gallus		NM_206987	zona pellucida binding protein 2	Gallus gallus
NM_001012878	nuclear receptor coactivator 7; similar to nuclear receptor coactivator 7	Gallus gallus		NM_001006382	fumarate hydratase	Gallus gallus
NM_001006210	nucleolar protein 11	Gallus gallus		NM_204773	secreted frizzled-related protein 2	Gallus gallus
NM_001079722	dynamin 1-like	Gallus gallus		NM_001030642	cerebellar degeneration-related protein 2, 62kDa	Gallus gallus
NM_204841	regulator of G-protein signaling 17	Gallus gallus		NM_001162393	ubiquitin specific peptidase like 1	Gallus gallus
NM_001159347	neuron navigator 3	Gallus gallus		NM_001006357	amyloid beta (A4) precursor protein-binding, family B, member 1 interacting protein	Gallus gallus
NM_001031161	transmembrane anterior posterior transformation 1	Gallus gallus		NM_204319	POU domain, class 1, transcription factor 1 (Pit1, growth hormone factor 1)	Gallus gallus
NM_001030946	tumor protein p53 inducible nuclear protein 1	Gallus gallus		NM_001031208	cleavage and polyadenylation specific factor 2, 100kDa	Gallus gallus
NM_001012862	jumonji, AT rich interactive domain 2	Gallus gallus		NM_001007892	cyclin-dependent kinase 6	Gallus gallus
NM_001030916	WD repeat domain 77	Gallus gallus		NM_001030627	similar to Hypothetical protein SB153, isoform 1	Gallus gallus
NM_001145430	hypothetical LOC769392	Gallus gallus		NM_001030585	N-acylaminoacyl-peptide hydrolase	Gallus gallus
NM_001007884	coiled-coil domain containing 43	Gallus gallus		NM_001007854	adiponectin receptor 2	Gallus gallus
NM_205378	neurotrophic tyrosine kinase, receptor, type 1	Gallus gallus		NM_001031010	geminin, DNA replication inhibitor	Gallus gallus
NM_001030882	glutamine-fructose-6-phosphate transaminase 1	Gallus gallus		NM_001031005	Regulation of nuclear pre-mRNA domain containing 1A	Gallus gallus
NM_001030981	histone deacetylase 9	Gallus gallus		NM_001011691	toll-like receptor 3	Gallus gallus
NM_204940	T, brachyury homolog (mouse)	Gallus gallus		NM_001044672	mu-calpain large subunit	Gallus gallus
NM_204719	chondroitin sulfate proteoglycan 5 (neuroglycan C)	Gallus gallus		NM_001031266	SEC22 vesicle trafficking protein homolog B (S. cerevisiae)	Gallus gallus
NM_001030830	crystallin, lambda 1	Gallus gallus		NM_204246	transforming growth factor, beta receptor I (activin A receptor type II-like kinase, 53kDa)	Gallus gallus
NM_001012693	mannosyl (beta-1,4-)-glycoprotein beta-1,4-N-acetylglucosaminyltransferase	Gallus gallus		NM_205223	GTP cyclohydrolase 1 (dopa-responsive dystonia)	Gallus gallus
NM_001163342	muscleblind-like 3 (Drosophila)	Gallus gallus		NM_205121	carbohydrate (chondroitin 6) sulfotransferase 3	Gallus gallus
NM_001163338	muscleblind-like 3 (Drosophila)	Gallus gallus		NM_001030684	general transcription factor IIIC, polypeptide 5, 63kDa	Gallus gallus
NM_001012573	muscleblind-like 3 (Drosophila)	Gallus gallus		NM_204705	hyaluronan binding protein 4	Gallus gallus
NM_001163339	muscleblind-like 3 (Drosophila)	Gallus gallus		NM_001099351	L-amino-acid oxidase precursor	Gallus gallus
NM_001163340	muscleblind-like 3 (Drosophila)	Gallus gallus		NM_001045834	chemokine (C-C motif) receptor 5	Gallus gallus
NM_001163341	muscleblind-like 3 (Drosophila)	Gallus gallus		NM_001006146	SLU7 splicing factor homolog (S. cerevisiae)	Gallus gallus
NM_001031418	small glutamine-rich tetratricopeptide repeat (TPR)-containing, beta	Gallus gallus		NM_001080715	myocardin	Gallus gallus
NM_001012881	E2F transcription factor 6	Gallus gallus		NM_001097645	B-cell receptor-associated protein 29	Gallus gallus
NM_001012805	chromosome 17 open reading frame 85	Gallus gallus		NM_001030347	cytotoxic and regulatory T cell molecule	Gallus gallus
NM_001006509	asparagine synthetase domain containing 1	Gallus gallus		NM_001145230	ADAM metallopeptidase domain 23	Gallus gallus
NM_001167761	vitelline membrane outer layer 1 homolog (chicken)	Gallus gallus		NM_001031006	coiled-coil domain containing 127	Gallus gallus
NM_205505	acetyl-Coenzyme A carboxylase alpha	Gallus gallus		NM_205080	calpain 2, (m/II) large subunit	Gallus gallus
NM_204660	calcium channel, voltage-dependent, gamma subunit 3	Gallus gallus		NM_001012887	NF-kappaB repressing factor	Gallus gallus
NM_001030581	outer mitochondrial membrane cytochrome b5	Gallus gallus		NM_001031008	testis expressed 10	Gallus gallus
NM_204227	cadherin 5, type 2, VE-cadherin (vascular epithelium)	Gallus gallus		NM_001048079	contactin associated protein-like 5	Gallus gallus
NM_204725	caspase 3, apoptosis-related cysteine peptidase	Gallus gallus		NM_001130738	phospholipase A2, group VI (cytosolic, calcium-independent)	Gallus gallus
NM_205444	tubulin, alpha 8	Gallus gallus		NM_001031220	AT rich interactive domain 5B (MRF1-like)	Gallus gallus
NM_001012834	kinesin family member 3B	Gallus gallus		NM_204646	butyrylcholinesterase	Gallus gallus
NM_001167701	caspase 2, apoptosis-related cysteine peptidase (neural precursor cell expressed, developmentally down-regulated 2)	Gallus gallus		NM_001165912	similar to prolactin-b	Gallus gallus
NM_001001528	amylase, alpha 1A; salivary	Gallus gallus		NM_205339	B-cell CLL/lymphoma 2	Gallus gallus
NM_001031262	coiled-coil domain containing 93	Gallus gallus		NM_001031348	vacuolar protein sorting 33 homolog B (yeast)	Gallus gallus
NM_001012549	neuroblastoma RAS viral (v-ras) oncogene homolog	Gallus gallus		NM_001030816	ligase IV, DNA, ATP-dependent	Gallus gallus
NM_001167764	similar to Heat shock factor protein 2 (HSF 2) (Heat shock transcription factor 2) (HSTF 2) (HSF 3B) (HSTF 3B); heat shock transcription factor 2	Gallus gallus		NM_001031181	WEE1 homolog (S. pombe)	Gallus gallus
NM_204431	coiled-coil domain containing 80	Gallus gallus		NM_001039283	metallophosphoesterase 1	Gallus gallus
NM_205411	3-hydroxy-3-methylglutaryl-Coenzyme A synthase 1 (soluble)	Gallus gallus		NM_205135	myomesin (M-protein) 2, 165kDa	Gallus gallus
NM_204906	potassium voltage-gated channel, shaker-related subfamily, beta member 1	Gallus gallus		NM_001030876	nucleolar complex associated 2 homolog (S. cerevisiae)	Gallus gallus
NM_001030926	DEAD (Asp-Glu-Ala-Asp) box polypeptide 42	Gallus gallus		NM_001031372	TAP binding protein-like; similar to TAP binding protein-like	Gallus gallus
NM_204129	similar to midline-1; midline 1	Gallus gallus		NM_001012602	translocation protein 1	Gallus gallus
NM_001012802	exocyst complex component 7	Gallus gallus		NM_001012945	DnaJ (Hsp40) homolog, subfamily A, member 1	Gallus gallus
NM_204542	nuclear receptor subfamily 1, group H, member 3	Gallus gallus		NM_001031103	tumor necrosis factor receptor superfamily, member 21	Gallus gallus
NM_001006216	chaperonin containing TCP1, subunit 6A (zeta 1)	Gallus gallus		NM_001001616	cytochrome P450, family 2, subfamily C, polypeptide 18; cytochrome P450 2H1	Gallus gallus
NM_205221	cyclic nucleotide gated channel alpha 3	Gallus gallus		NM_001031226	peptidylprolyl isomerase F	Gallus gallus
NM_205497	epidermal growth factor receptor (erythroblastic leukemia viral (v-erb-b) oncogene homolog, avian)	Gallus gallus		NM_001008674	similar to EKN1; dyslexia susceptibility 1 candidate 1	Gallus gallus
NM_001030773	muskelin 1, intracellular mediator containing kelch motifs	Gallus gallus		NM_001031475	arrestin domain containing 1	Gallus gallus
NM_001031153	similar to Putative ubiquitin-conjugating enzyme E2 D3-like protein	Gallus gallus		NM_001079741	chromosome 13 open reading frame 34	Gallus gallus
NM_001031146	transmembrane protein 66	Gallus gallus		NM_204555	similar to Kv channel-interacting protein; Kv channel interacting protein 4	Gallus gallus
NM_204879	zona pellucida glycoprotein 4	Gallus gallus		NM_001006489	X-ray repair complementing defective repair in Chinese hamster cells 3	Gallus gallus
NM_001030626	protein inhibitor of activated STAT, 2	Gallus gallus		NM_001012943	syntaxin 7; similar to syntaxin 7	Gallus gallus
NM_001030745	zinc finger, DHHC-type containing 17	Gallus gallus		NM_001006145	IK cytokine, down-regulator of HLA II	Gallus gallus
NM_001030752	WD repeat domain 91	Gallus gallus		NM_001001777	glutathione S-transferase alpha 3	Gallus gallus
NM_001044654	protocadherin 15	Gallus gallus		NM_001006435	magnesium transporter 1	Gallus gallus
NM_001044633	apolipoprotein B (including Ag(x) antigen)	Gallus gallus		NM_001006335	SWI/SNF related, matrix associated, actin dependent regulator of chromatin, subfamily e, member 1	Gallus gallus
NM_204113	nuclear receptor subfamily 1, group H, member 4	Gallus gallus		NM_001006246	ATPase, H+ transporting, lysosomal 31kDa, V1 subunit E1	Gallus gallus
NM_001033645	epoxide hydrolase 2, cytoplasmic	Gallus gallus		NM_001030736	glycosyltransferase 8 domain containing 3	Gallus gallus
NM_001030740	NEL-like 2 (chicken)	Gallus gallus		NM_205355	ring finger protein 13	Gallus gallus
NM_001122763	ribosomal protein L37	Gallus gallus		NM_204756	v-maf musculoaponeurotic fibrosarcoma oncogene homolog K	Gallus gallus
NM_001079750	WD repeat and FYVE domain containing 2	Gallus gallus		NM_001030625	coiled-coil domain containing 5 (spindle associated)	Gallus gallus
NM_205018	interleukin 8	Gallus gallus		NM_205032	insulin-like growth factor 1 receptor	Gallus gallus
NM_205509	fibroblast growth factor receptor 3	Gallus gallus		NM_204515	interleukin 17 receptor D	Gallus gallus
NM_001012905	exocyst complex component 6; similar to exocyst complex component 6	Gallus gallus		NM_001031580	Hermansky-Pudlak syndrome 1	Gallus gallus
NM_001031250	CWC22 spliceosome-associated protein homolog (S. cerevisiae)	Gallus gallus		NM_001031236	soc-2 suppressor of clear homolog (C. elegans)	Gallus gallus
NM_001080890	distal-less homeobox 6	Gallus gallus		NM_204733	CD40 ligand (TNF superfamily, member 5, hyper-IgM syndrome)	Gallus gallus
NM_001030860	microtubule-associated protein, RP/EB family, member 1	Gallus gallus		NM_001006267	arginine and glutamate rich 1	Gallus gallus
NM_204495	collapsin response mediator protein 1	Gallus gallus		NM_001006134	ubiquitin specific peptidase 4 (proto-oncogene)	Gallus gallus
NM_001142256	calponin 2	Gallus gallus		NM_001044671	v-maf musculoaponeurotic fibrosarcoma oncogene homolog (avian)	Gallus gallus
NM_001006232	WD repeat domain 51B	Gallus gallus		NM_204262	period homolog 2 (Drosophila)	Gallus gallus
NM_205187	SRY (sex determining region Y)-box 11	Gallus gallus		NM_001001743	fibroblast growth factor 13	Gallus gallus
NM_001006245	WAS protein family homolog 2 pseudogene	Gallus gallus		NM_001039303	methylenetetrahydrofolate dehydrogenase (NADP+ dependent) 1, methenyltetrahydrofolate cyclohydrolase, formyltetrahydrofolate synthetase	Gallus gallus
NM_001012798	exosome component 2	Gallus gallus		NM_204209	osteoglycin	Gallus gallus
NM_001031494	serine/arginine repetitive matrix 1	Gallus gallus		NM_001039297	integrator complex subunit 10	Gallus gallus
NM_204808	mitochondrial carrier homolog 2 (C. elegans)	Gallus gallus		NM_204215	tumor protein D52-like 1	Gallus gallus
NM_001030615	clathrin interactor 1	Gallus gallus		NM_204504	basic helix-loop-helix domain containing, class B, 4	Gallus gallus
NM_001167765	cyclin C	Gallus gallus		NM_001006268	UBA domain containing 2	Gallus gallus
NM_001006513	solute carrier family 19 (folate transporter), member 1	Gallus gallus		NM_001031070	zinc finger and BTB domain containing 2	Gallus gallus
NM_001006347	OTU domain containing 6B	Gallus gallus		NM_204401	tribbles homolog 2 (Drosophila)	Gallus gallus
NM_001012865	chromosome 6 open reading frame 32	Gallus gallus		NM_001031075	RWD domain containing 1	Gallus gallus
NM_204172	limb region 1 homolog (mouse)	Gallus gallus		NM_204760	cholinergic receptor, nicotinic, alpha 9	Gallus gallus
NM_204681	N-acetylglucosaminyltransferase VI	Gallus gallus		NM_001031275	holocytochrome c synthase (cytochrome c heme-lyase)	Gallus gallus
NM_204947	RFNG O-fucosylpeptide 3-beta-N-acetylglucosaminyltransferase	Gallus gallus		NM_205199	purinergic receptor P2Y, G-protein coupled, 5	Gallus gallus
NM_204136	early growth response 1	Gallus gallus		NM_204197	dihydropyrimidinase-like 4	Gallus gallus
NM_001012555	mal, T-cell differentiation protein 2	Gallus gallus		NM_204374	serine/threonine kinase 25 (STE20 homolog, yeast)	Gallus gallus
NM_001030603	RAD18 homolog (S. cerevisiae)	Gallus gallus		NM_001037271	glycerophosphodiester phosphodiesterase domain containing 5; similar to glycerophosphodiester phosphodiesterase 2	Gallus gallus
NM_001031345	cathepsin S	Gallus gallus		NM_001031429	similar to Auh protein	Gallus gallus
NM_204619	homeobox A11	Gallus gallus		NM_001031495	metal-regulatory transcription factor 1	Gallus gallus
NM_001044637	cytospin A	Gallus gallus		NM_001008463	phosphatidylglycerophosphate synthase 1	Gallus gallus
NM_001030700	COX10 homolog, cytochrome c oxidase assembly protein, heme A: farnesyltransferase (yeast)	Gallus gallus		NM_206992	similar to single-strand telomeric DNA-binding protein; cPot1; POT1 protection of telomeres 1 homolog (S. pombe)	Gallus gallus
NM_001030933	signal peptide peptidase-like 2B	Gallus gallus		NM_001031088	tumor suppressing subtransferable candidate 1	Gallus gallus
NM_205231	neurotrophic tyrosine kinase, receptor, type 2	Gallus gallus		NM_001030811	REV1 homolog (S. cerevisiae)	Gallus gallus
NM_001031371	protein phosphatase 2A activator, regulatory subunit 4	Gallus gallus		NM_204677	bromodomain adjacent to zinc finger domain, 2B	Gallus gallus
NM_204859	interferon (alpha, beta and omega) receptor 1	Gallus gallus		NM_001006160	nudix (nucleoside diphosphate linked moiety X)-type motif 1	Gallus gallus
NM_204505	regulator of G protein signalling 9 binding protein	Gallus gallus		NM_001044634	WD repeat domain 36	Gallus gallus
NM_001031538	annexin A5	Gallus gallus		NM_001048078	interleukin 13 receptor, alpha 2	Gallus gallus
NM_001006506	BUB3 budding uninhibited by benzimidazoles 3 homolog (yeast)	Gallus gallus		NM_001030621	SAR1 homolog B (S. cerevisiae); SAR1 homolog A (S. cerevisiae)	Gallus gallus
NM_001031150	RAP1, GTP-GDP dissociation stimulator 1	Gallus gallus		NM_204551	inversin	Gallus gallus
NM_001039317	transient receptor potential cation channel, subfamily C, member 4 associated protein	Gallus gallus		NM_001012797	proteasome (prosome, macropain) 26S subunit, non-ATPase, 5	Gallus gallus
NM_001008452	Ras association (RalGDS/AF-6) domain family 5	Gallus gallus		NM_001012603	GINS complex subunit 1 (Psf1 homolog)	Gallus gallus
NM_001031278	phosphatidylinositol glycan anchor biosynthesis, class K	Gallus gallus		NM_205474	myosin, heavy chain 10, non-muscle; myosin, heavy chain 11, smooth muscle; similar to Myosin-11 (Myosin heavy chain, gizzard smooth muscle); similar to myosin, heavy chain 9, non-muscle	Gallus gallus
NM_001008457	UDP-GlcNAc:betaGal beta-1,3-N-acetylglucosaminyltransferase 2	Gallus gallus		NM_001006449	signal recognition particle 72kDa	Gallus gallus
NM_001006348	MTERF domain containing 1	Gallus gallus		NM_001031137	coiled-coil domain containing 111	Gallus gallus
NM_204476	serum/glucocorticoid regulated kinase 1	Gallus gallus		NM_204864	similar to myocyte-specific enhancer factor 2A, C9 form; myocyte enhancer factor 2A	Gallus gallus
NM_001012810	ubiquitin-conjugating enzyme E2N (UBC13 homolog, yeast)	Gallus gallus		NM_001031288	24-dehydrocholesterol reductase	Gallus gallus
NM_204857	interleukin 10 receptor, beta	Gallus gallus		NM_001079486	fibrinogen-like 2	Gallus gallus
NM_204932	otokeratin	Gallus gallus		NM_204105	sidekick 1	Gallus gallus
NM_204794	estrogen receptor 2 (ER beta)	Gallus gallus		NM_204782	neuropilin 1	Gallus gallus
NM_204913	glutamate decarboxylase 1 (brain, 67kDa)	Gallus gallus		NM_001012899	similar to similar to glutamate transporter 1 variant; solute carrier family 1 (glial high affinity glutamate transporter), member 2	Gallus gallus
NM_001079502	fucosyltransferase 9 (alpha (1,3) fucosyltransferase)	Gallus gallus		NM_001006508	PMS1 postmeiotic segregation increased 1 (S. cerevisiae)	Gallus gallus
NM_001012910	neuralized homolog (Drosophila)	Gallus gallus		NM_001030917	adaptor-related protein complex 4, beta 1 subunit	Gallus gallus
NM_001044661	v-erb-b2 erythroblastic leukemia viral oncogene homolog 2, neuro/glioblastoma derived oncogene homolog (avian)	Gallus gallus		NM_001167744	creatine kinase, mitochondrial 2 (sarcomeric)	Gallus gallus
NM_001031117	serine/threonine protein kinase MST4	Gallus gallus		NM_001114852	short coiled-coil protein	Gallus gallus
NM_001006265	cell division cycle 16 homolog (S. cerevisiae)	Gallus gallus		NM_001007900	yippee-like 5 (Drosophila)	Gallus gallus
NM_001130741	similar to Inter-alpha-trypsin inhibitor heavy chain H2 precursor (ITI heavy chain H2) (Inter-alpha-inhibitor heavy chain 2) (Inter-alpha-trypsin inhibitor complex component II) (Serum-derived hyaluronan-associated protein) (SHAP); similar to inter-alpha-trypsin inhibitor heavy chain 2; inter-alpha (globulin) inhibitor H2	Gallus gallus		NM_001006420	nuclear receptor binding protein 1	Gallus gallus
NM_001012923	RAB GTPase activating protein 1-like	Gallus gallus		NM_001006349	eukaryotic translation initiation factor 3, subunit E	Gallus gallus
NM_001031286	origin recognition complex, subunit 1-like (yeast)	Gallus gallus		NM_001114638	fructosamine 3 kinase related protein	Gallus gallus
NM_001004381	contactin 1	Gallus gallus		NM_001030925	FtsJ homolog 3 (E. coli)	Gallus gallus
				NM_001012858	integrin, alpha 9	Gallus gallus
				NM_001008469	transmembrane protein 41B	Gallus gallus
				NM_204468	telomeric repeat binding factor 2, interacting protein	Gallus gallus
				NM_001039334	similar to RAS protein activator like 1; GAP1 like protein; RAS-GTPase-activating protein-like	Gallus gallus
				NM_205375	transcription factor 12	Gallus gallus
				NM_204880	activating transcription factor 4 (tax-responsive enhancer element B67); similar to ATF4	Gallus gallus
				NM_206977	ADAM metallopeptidase domain 20	Gallus gallus
				NM_001168008	dolichyl-diphosphooligosaccharide-protein glycosyltransferase	Gallus gallus
				NM_001031155	sarcoglycan, beta (43kDa dystrophin-associated glycoprotein)	Gallus gallus
				NM_204682	similar to qin-induced kinase; salt-inducible kinase 1	Gallus gallus
				NM_001006249	similar to polyhomeotic homolog 1 (Drosophila); polyhomeotic homolog 1 (Drosophila)	Gallus gallus
				NM_204119	endothelin receptor type A	Gallus gallus
				NM_204663	solute carrier family 16, member 3 (monocarboxylic acid transporter 4)	Gallus gallus
				NM_204583	ZW10, kinetochore associated, homolog (Drosophila)	Gallus gallus
				NM_001006577	similar to hypothetical protein FLJ13611	Gallus gallus
				NM_001012696	phosphoinositide-3-kinase, catalytic, delta polypeptide	Gallus gallus
				NM_001006418	family with sequence similarity 49, member A	Gallus gallus
				NM_204998	ribonuclease H1	Gallus gallus
				NM_204133	aryl hydrocarbon receptor nuclear translocator-like 2	Gallus gallus
				NM_001031011	slowmo homolog 1 (Drosophila)	Gallus gallus
				NM_001111132	protocadherin alpha 2	Gallus gallus
				NM_001030602	eukaryotic translation initiation factor 4E family member 3	Gallus gallus
				NM_001097539	leucine rich repeat neuronal 1	Gallus gallus
				NM_001079488	dUTP pyrophosphatase	Gallus gallus
				NM_001005347	Ellis van Creveld syndrome	Gallus gallus
				NM_001031450	WD repeat domain 70	Gallus gallus
				NM_001030571	SUMO1 activating enzyme subunit 2	Gallus gallus
				NM_204560	activin A receptor, type I	Gallus gallus
				NM_001103201	KIAA0776	Gallus gallus
				NM_001012942	exportin 7	Gallus gallus
				NM_001006136	acyl-Coenzyme A dehydrogenase family, member 9	Gallus gallus
				NM_001030703	jumonji domain containing 6	Gallus gallus
				NM_001031365	cell cycle associated protein 1	Gallus gallus
				NM_205131	zinc finger E-box binding homeobox 1	Gallus gallus
				NM_001006437	NFKB activating protein	Gallus gallus
				NM_001012570	leucine rich repeat containing 59	Gallus gallus
				NM_204509	receptor tyrosine kinase-like orphan receptor 1	Gallus gallus
				NM_205426	LIM homeobox 9	Gallus gallus
				NM_001006234	leukotriene A4 hydrolase	Gallus gallus
				NM_001030878	TAR DNA binding protein	Gallus gallus
				NM_204671	synuclein, beta	Gallus gallus
				NM_001030819	ATP-binding cassette, sub-family C (CFTR/MRP), member 4	Gallus gallus
				NM_205268	similar to cellular proto-oncogene protein Nov; nephroblastoma overexpressed gene	Gallus gallus
				NM_205101	GDNF family receptor alpha 2	Gallus gallus
				NM_001004429	transforming, acidic coiled-coil containing protein 3	Gallus gallus
				NM_204261	ADAM metallopeptidase domain 10	Gallus gallus
				NM_001146138	immunoglobulin-like receptor CHIR-A2	Gallus gallus
				NM_001079497	tryptophan rich basic protein	Gallus gallus
				NM_001031433	iduronidase, alpha-L-	Gallus gallus
				NM_001012821	zinc finger protein 92 homolog (mouse)	Gallus gallus
				NM_001113761	UDP-GlcNAc:betaGal beta-1,3-N-acetylglucosaminyltransferase 5	Gallus gallus
				NM_001003718	odz, odd Oz/ten-m homolog 2 (Drosophila)	Gallus gallus
				NM_204097	odz, odd Oz/ten-m homolog 2 (Drosophila)	Gallus gallus
				NM_205217	ST3 beta-galactoside alpha-2,3-sialyltransferase 1	Gallus gallus
				NM_001145228	ADAM metallopeptidase domain 22	Gallus gallus
				NM_204847	FK506 binding protein 9, 63 kDa	Gallus gallus
				NM_205035	ephrin-B1	Gallus gallus
				NM_001007490	apoptosis-inducing factor, mitochondrion-associated, 1	Gallus gallus
				NM_001013611	claudin 1	Gallus gallus
				NM_001098238	THO complex 7 homolog (Drosophila)	Gallus gallus
				NM_205461	peptidylprolyl isomerase B (cyclophilin B)	Gallus gallus
				NM_001031337	similar to Serine/threonine kinase 3 (STE20 homolog, yeast); similar to MST2	Gallus gallus
				NM_205161	zinc finger protein 161 homolog (mouse)	Gallus gallus
				NM_204453	similar to TBX15 protein; T-box 18	Gallus gallus
				NM_001031490	TBC1 domain family, member 22A; similar to TBC1 domain family, member 22A	Gallus gallus
				NM_204380	telomeric repeat binding factor (NIMA-interacting) 1	Gallus gallus
				NM_001080104	gastric inhibitory polypeptide	Gallus gallus
				NM_001031488	neurotrophin 3	Gallus gallus
				NM_001109762	neurotrophin 3	Gallus gallus
				NM_001031401	hematopoietic cell-specific Lyn substrate 1	Gallus gallus
				NM_001030808	phosphatidylinositol glycan anchor biosynthesis, class A (paroxysmal nocturnal hemoglobinuria)	Gallus gallus
				NM_001037829	EF-hand domain (C-terminal) containing 2	Gallus gallus
				NM_001030648	neuroepithelial cell transforming gene 1	Gallus gallus
				NM_204458	raftlin, lipid raft linker 1	Gallus gallus
				NM_001001876	heparan sulfate proteoglycan 2	Gallus gallus
				NM_001031386	CBF1 interacting corepressor	Gallus gallus
				NM_001039263	ribosomal L1 domain containing 1	Gallus gallus
				NM_205023	spleen focus forming virus (SFFV) proviral integration oncogene spi1	Gallus gallus
				NM_001030727	dihydrolipoamide dehydrogenase	Gallus gallus
				NM_204239	Era G-protein-like 1 (E. coli)	Gallus gallus
				NM_205134	nuclear factor of kappa light polypeptide gene enhancer in B-cells 1	Gallus gallus
				NM_205242	low density lipoprotein-related protein 1	Gallus gallus
				NM_204275	interleukin 1 receptor-like 1	Gallus gallus
				NM_204238	disabled homolog 1 (Drosophila)	Gallus gallus
				NM_001012892	succinate-CoA ligase, GDP-forming, alpha subunit	Gallus gallus
				NM_001030913	S-adenosylhomocysteine hydrolase-like 1	Gallus gallus
				NM_204210	diaphanous homolog 1 (Drosophila)	Gallus gallus
				NM_204893	homeobox C8	Gallus gallus
				NM_001030751	SCY1-like 2 (S. cerevisiae)	Gallus gallus
				NM_001001899	gametogenetin binding protein 2	Gallus gallus
				NM_001031291	phosphodiesterase 4B, cAMP-specific (phosphodiesterase E4 dunce homolog, Drosophila)	Gallus gallus
				NM_001006549	large subunit GTPase 1 homolog (S. cerevisiae)	Gallus gallus
				NM_001006487	Enah/Vasp-like	Gallus gallus
				NM_001006481	eukaryotic translation initiation factor 2B, subunit 2 beta, 39kDa	Gallus gallus
				NM_001012886	transmembrane protein 164	Gallus gallus
				NM_001127313	motilin receptor	Gallus gallus
				NM_001122691	thioredoxin reductase 2	Gallus gallus
				NM_001006252	TAF13 RNA polymerase II, TATA box binding protein (TBP)-associated factor, 18kDa	Gallus gallus
				NM_204923	KS5 protein	Gallus gallus
				NM_001030750	neural precursor cell expressed, developmentally down-regulated 1	Gallus gallus
				NM_001030375	matrilin 1, cartilage matrix protein	Gallus gallus
				NM_001042538	spectrin, alpha, non-erythrocytic 1 (alpha-fodrin)	Gallus gallus
				NM_001012540	tubulin tyrosine ligase-like family, member 12	Gallus gallus
				NM_204297	hypoxia-inducible factor 1, alpha subunit (basic helix-loop-helix transcription factor)	Gallus gallus
				NM_001030660	ras homolog gene family, member F (in filopodia)	Gallus gallus
				NM_205155	fatty acid synthase	Gallus gallus
				NM_001006539	aldo-keto reductase family 1, member A1 (aldehyde reductase)	Gallus gallus
				NM_001001296	ISG12-2 protein-like	Gallus gallus
				NM_001031491	cathepsin A	Gallus gallus
				NM_001007828	protein tyrosine phosphatase-like A domain containing 1	Gallus gallus
				NM_001006277	N-6 adenine-specific DNA methyltransferase 2 (putative)	Gallus gallus
				NM_204471	ubiquitin specific peptidase 7 (herpes virus-associated)	Gallus gallus
				NM_001031119	choroideremia-like (Rab escort protein 2)	Gallus gallus
				NM_001006529	plakophilin 4	Gallus gallus
				NM_204911	homeobox B8	Gallus gallus
				NM_001006237	Ran GTPase activating protein 1	Gallus gallus
				NM_001012903	annexin A11	Gallus gallus
				NM_001006177	chromosome 20 open reading frame 3	Gallus gallus
				NM_001030854	chromosome 20 open reading frame 121	Gallus gallus
				NM_001044665	collectin sub-family member 11	Gallus gallus
				NM_001031297	zinc finger, RAN-binding domain containing 2	Gallus gallus
				NM_001030584	6-phosphofructo-2-kinase/fructose-2,6-biphosphatase 4	Gallus gallus
				NM_001040228	integrator complex subunit 8	Gallus gallus
				NM_001045835	chemokine (C-C motif) receptor 2	Gallus gallus
				NM_001007960	solute carrier family 25, member 36	Gallus gallus
				NM_001033850	thyroid stimulating hormone receptor	Gallus gallus
				NM_001007970	ADP-ribosylation factor-like 2 binding protein	Gallus gallus
				NM_204666	C-type lectin domain family 3, member B	Gallus gallus
				NM_001001767	zinc finger protein 313	Gallus gallus
				NM_001025578	MAD2 mitotic arrest deficient-like 2 (yeast)	Gallus gallus
				NM_204532	centromere protein I	Gallus gallus
				NM_205531	wingless-type MMTV integration site family, member 8A	Gallus gallus
				NM_204805	tyrosine hydroxylase	Gallus gallus
				NM_204970	insulin-like growth factor 2 receptor	Gallus gallus
				NM_001006525	ELL associated factor 2	Gallus gallus
				NM_001134359	Fanconi anemia, complementation group A	Gallus gallus
				NM_001031274	solute carrier family 35 (UDP-N-acetylglucosamine (UDP-GlcNAc) transporter), member A3	Gallus gallus
				NM_204889	LIM homeobox 2	Gallus gallus
				NM_001045830	mediator complex subunit 22; similar to Surf5b	Gallus gallus
				NM_001012772	CTD (carboxy-terminal domain, RNA polymerase II, polypeptide A) small phosphatase like 2	Gallus gallus
				NM_001030765	cholinergic receptor, muscarinic 2	Gallus gallus
				NM_001006280	mediator complex subunit 17	Gallus gallus
				NM_001030958	chromosome 1 open reading frame 69	Gallus gallus
				NM_205125	dickkopf homolog 3 (Xenopus laevis)	Gallus gallus
				NM_001031210	YY1 transcription factor	Gallus gallus
				NM_204645	centromere protein F, 350/400ka (mitosin)	Gallus gallus
				NM_001039324	transmembrane channel-like 2	Gallus gallus
				NM_001031245	LanC lantibiotic synthetase component C-like 1 (bacterial)	Gallus gallus
				NM_204474	similar to type IIb sodium phosphate cotransporter; solute carrier family 34 (sodium phosphate), member 2	Gallus gallus
				NM_205031	NK2 transcription factor related, locus 3	Gallus gallus
				NM_001029981	chromosome 20 open reading frame 111	Gallus gallus
				NM_204806	hyaluronan synthase 2	Gallus gallus
				NM_204693	methyl-CpG binding domain protein 4	Gallus gallus
				NM_001006130	similar to Usp10-prov protein; ubiquitin specific peptidase 10; hypothetical LOC430975	Gallus gallus
				NM_204213	cyclin D2; similar to cyclin D2	Gallus gallus
				NM_001030900	eukaryotic translation initiation factor 2C, 3	Gallus gallus
				NM_205002	inhibitor of DNA binding 2, dominant negative helix-loop-helix protein	Gallus gallus
				NM_001115082	endothelial differentiation, lysophosphatidic acid G-protein-coupled receptor, 2	Gallus gallus
				NM_204147	matrin 3	Gallus gallus
				NM_001031440	nuclear cap binding protein subunit 1, 80kDa	Gallus gallus
				NM_001111128	protocadherin alpha 11	Gallus gallus
				NM_001031188	recombination activating gene 1	Gallus gallus
				NM_001030713	glioblastoma amplified sequence	Gallus gallus
				NM_001006317	nuclear factor related to kappaB binding protein	Gallus gallus
				NM_001030798	chromosome 21 open reading frame 33; hypothetical protein LOC777096; similar to homolog of zebrafish ES1	Gallus gallus
				NM_001031610	PC4 and SFRS1 interacting protein 1	Gallus gallus
				NM_001031024	syndecan binding protein (syntenin)	Gallus gallus
				NM_001012569	adenosylmethionine decarboxylase 1	Gallus gallus
				NM_204568	c-fos induced growth factor (vascular endothelial growth factor D)	Gallus gallus
				NM_001030667	D-dopachrome tautomerase	Gallus gallus
				NM_001045838	chemokine (C motif) receptor 1	Gallus gallus
				NM_204224	potassium large conductance calcium-activated channel, subfamily M, alpha member 1	Gallus gallus
				NM_001079730	adducin 1 (alpha)	Gallus gallus
				NM_001004404	like-glycosyltransferase	Gallus gallus
				NM_001030594	tRNA splicing endonuclease 2 homolog (S. cerevisiae)	Gallus gallus
				NM_001037836	lymphocyte antigen 75	Gallus gallus
				NM_001008683	DNA cross-link repair 1A (PSO2 homolog, S. cerevisiae)	Gallus gallus
				NM_001143969	ADP-ribosylation factor-like 5B	Gallus gallus
				NM_001031340	similar to ceramide kinase; ceramide kinase	Gallus gallus
				NM_001012838	KIAA0090; similar to similar to KIAA0090 protein	Gallus gallus
				NM_001031397	inhibitor of kappa light polypeptide gene enhancer in B-cells, kinase beta	Gallus gallus
				NM_001012695	hairy and enhancer of split 5 (Drosophila)	Gallus gallus
				NM_206983	phospholipase A2 receptor 1, 180kDa	Gallus gallus
				NM_001098608	osteocrin	Gallus gallus
				NM_206874	ryanodine receptor 3	Gallus gallus
				NM_001006191	TRAF-type zinc finger domain containing 1	Gallus gallus
				NM_001012583	cysteinyl-tRNA synthetase	Gallus gallus
				NM_001030340	protein phosphatase 3 (formerly 2B), catalytic subunit, beta isoform	Gallus gallus
				NM_001007873	spermatogenesis associated 2	Gallus gallus
				NM_001030683	globoside alpha-1,3-N-acetylgalactosaminyltransferase 1	Gallus gallus
				NM_001030965	protein kinase, AMP-activated, gamma 2 non-catalytic subunit	Gallus gallus
				NM_001012601	fragile X mental retardation, autosomal homolog 1; similar to fragile X mental retardation, autosomal homolog 1	Gallus gallus
				NM_001012896	adaptor-related protein complex 2, alpha 2 subunit	Gallus gallus
				NM_204316	adenosine A1 receptor	Gallus gallus
				NM_205334	similar to collagen XIV; collagen, type XIV, alpha 1 (undulin); similar to collagen, type XIV, alpha 1 (undulin)	Gallus gallus
				NM_001162390	collagen, type IV, alpha 2	Gallus gallus
				NM_204942	CAP-GLY domain containing linker protein 1	Gallus gallus
				NM_001006514	lanosterol synthase (2,3-oxidosqualene-lanosterol cyclase)	Gallus gallus
				NM_001030592	ATG7 autophagy related 7 homolog (S. cerevisiae)	Gallus gallus
				NM_001030659	transmembrane protein 120B	Gallus gallus
				NM_001012933	dual adaptor of phosphotyrosine and 3-phosphoinositides; hypothetical LOC425452	Gallus gallus
				NM_204416	cholinergic receptor, nicotinic, alpha 3	Gallus gallus
				NM_001006463	required for meiotic nuclear division 5 homolog A (S. cerevisiae)	Gallus gallus
				NM_204750	thymine-DNA glycosylase	Gallus gallus
				NM_205027	tropomodulin 1	Gallus gallus
				NM_001001776	glutathione S-transferase class-alpha	Gallus gallus
				NM_001031094	UBX domain containing 4	Gallus gallus
				NM_001012769	hypothetical LOC426241; signal peptide peptidase-like 2A	Gallus gallus
				NM_001006281	NADH dehydrogenase (ubiquinone) 1 alpha subcomplex, 9, 39kDa	Gallus gallus
				NM_001030874	tumor necrosis factor receptor superfamily, member 18	Gallus gallus
				NM_001030851	protein phosphatase 1, regulatory (inhibitor) subunit 16B	Gallus gallus
				NM_001006590	wingless-type MMTV integration site family, member 10A	Gallus gallus
				NM_001012699	myotubularin related protein 8	Gallus gallus
				NM_001006462	inner membrane protein, mitochondrial (mitofilin); similar to inner membrane protein, mitochondrial (mitofilin)	Gallus gallus
				NM_001031414	LysM, putative peptidoglycan-binding, domain containing 3	Gallus gallus
				NM_001030715	SET and MYND domain containing 4	Gallus gallus
				NM_204708	DEAD (Asp-Glu-Ala-Asp) box polypeptide 4	Gallus gallus
				NM_001012929	RAS p21 protein activator 2	Gallus gallus
				NM_001130387	interferon gamma receptor 1	Gallus gallus
				NM_205443	plasminogen activator, urokinase	Gallus gallus
				NM_001080875	succinate dehydrogenase complex, subunit B, iron sulfur (Ip)	Gallus gallus
				NM_206951	EPH receptor B2	Gallus gallus
				NM_001030536	aconitase 1, soluble	Gallus gallus
				NM_204680	zinc finger and BTB domain containing 7A	Gallus gallus
				NM_001031017	microtubule-associated protein, RP/EB family, member 2	Gallus gallus
				NM_205473	neuropeptide Y	Gallus gallus
				NM_001006181	topoisomerase (DNA) III beta	Gallus gallus
				NM_204327	similar to TNF family B cell activation factor; tumor necrosis factor (ligand) superfamily, member 13b	Gallus gallus
				NM_001012575	trimethyllysine hydroxylase, epsilon	Gallus gallus
				NM_204678	transformer 2 beta homolog (Drosophila)	Gallus gallus
				NM_001005833	chromosome 16 open reading frame 80	Gallus gallus
				NM_001031040	EH-domain containing 3	Gallus gallus
				NM_001039332	Williams Beuren syndrome chromosome region 22	Gallus gallus
				NM_001111139	protocadherin alpha 9	Gallus gallus
				NM_204676	caudal type homeobox 1	Gallus gallus
				NM_205057	rabaptin, RAB GTPase binding effector protein 1	Gallus gallus
				NM_001080105	G protein-coupled receptor 39	Gallus gallus
				NM_205028	ciliary neurotrophic factor receptor	Gallus gallus
				NM_001031067	lin-7 homolog C (C. elegans)	Gallus gallus
				NM_204247	ectonucleoside triphosphate diphosphohydrolase 8	Gallus gallus
				NM_001006574	chromosome 5 open reading frame 21	Gallus gallus
				NM_204135	SMT3 suppressor of mif two 3 homolog 1 (S. cerevisiae)	Gallus gallus
				NM_001030550	integrin beta 1 binding protein 3	Gallus gallus
				NM_001030981	histone deacetylase 9	Gallus gallus
				NM_001039284	forkhead box N2	Gallus gallus
				NM_001012595	SCY1-like 3 (S. cerevisiae); similar to SCY1-like 3 (S. cerevisiae)	Gallus gallus
				NM_001030840	similar to similar to USP6NL protein; similar to USP6NL protein; similar to USP6 N-terminal like	Gallus gallus
				NM_001012823	acyl-CoA thioesterase 9	Gallus gallus
				NM_001030842	similar to similar to MGC69149 protein; similar to MGC69149 protein	Gallus gallus
				NM_001031419	solute carrier family 30 (zinc transporter), member 5	Gallus gallus
				NM_205115	LIM domain kinase 2	Gallus gallus
				NM_204725	caspase 3, apoptosis-related cysteine peptidase	Gallus gallus
				NM_001005820	transmembrane channel-like 3	Gallus gallus
				NM_204766	myosin, heavy polypeptide 6, cardiac muscle, alpha	Gallus gallus
				NM_204431	coiled-coil domain containing 80	Gallus gallus
				NM_001011690	liver ribonuclease A	Gallus gallus
				NM_205411	3-hydroxy-3-methylglutaryl-Coenzyme A synthase 1 (soluble)	Gallus gallus
				NM_001031268	family with sequence similarity 20, member B	Gallus gallus
				NM_001030825	nuclear fragile X mental retardation protein interacting protein 1	Gallus gallus
				NM_001079494	adaptor-related protein complex 2, mu 1 subunit	Gallus gallus
				NM_001006554	programmed cell death 10	Gallus gallus
				NM_205396	inhibin, beta A	Gallus gallus
				NM_001031317	cholinergic receptor, nicotinic, delta	Gallus gallus
				NM_001030902	small ArfGAP2	Gallus gallus
				NM_204831	histone deacetylase 2	Gallus gallus
				NM_205301	v-yes-1 Yamaguchi sarcoma viral oncogene homolog 1	Gallus gallus
				NM_204542	nuclear receptor subfamily 1, group H, member 3	Gallus gallus
				NM_205221	cyclic nucleotide gated channel alpha 3	Gallus gallus
				NM_204222	frizzled homolog 2 (Drosophila)	Gallus gallus
				NM_001079727	REST corepressor 3	Gallus gallus
				NM_001012917	similar to WAS/WASL interacting protein family, member 1; WAS/WASL interacting protein family, member 1	Gallus gallus
				NM_204142	vav 2 guanine nucleotide exchange factor; similar to GDP/GTP exchange factor VAV2; VAV2	Gallus gallus
				NM_001030869	similar to zinc finger protein 64 homolog (mouse); zinc finger protein 64 homolog (mouse)	Gallus gallus
				NM_001001304	polymerase (DNA directed), eta	Gallus gallus
				NM_205283	lysosomal-associated membrane protein 1	Gallus gallus
				NM_001006132	adaptor-related protein complex 1, gamma 1 subunit	Gallus gallus
				NM_001008466	RAB33B, member RAS oncogene family	Gallus gallus
				NM_001030691	SET translocation (myeloid leukemia-associated)	Gallus gallus
				NM_001012905	exocyst complex component 6; similar to exocyst complex component 6	Gallus gallus
				NM_204690	cone-type transducin alpha subunit	Gallus gallus
				NM_206957	deoxyribonuclease I	Gallus gallus
				NM_001006206	G protein pathway suppressor 1	Gallus gallus
				NM_001001131	ghrelin/obestatin preprohormone	Gallus gallus
				NM_204707	sal-like 1 (Drosophila)	Gallus gallus
				NM_001097614	deiodinase, iodothyronine, type I	Gallus gallus
				NM_001031200	chromosome 15 open reading frame 41	Gallus gallus
				NM_001111323	FAT tumor suppressor homolog 3 (Drosophila)	Gallus gallus
				NM_001006551	methylcrotonoyl-Coenzyme A carboxylase 1 (alpha)	Gallus gallus
				NM_001030555	family with sequence similarity 96, member A	Gallus gallus
				NM_001031343	tyrosine 3-monooxygenase/tryptophan 5-monooxygenase activation protein, zeta polypeptide	Gallus gallus
				NM_001030635	flightless I homolog (Drosophila)	Gallus gallus
				NM_001031332	G-2 and S-phase expressed 1	Gallus gallus
				NM_204459	regulator of G-protein signalling 3	Gallus gallus
				NM_001048051	regulator of G-protein signalling 3	Gallus gallus
				NM_001014968	similar to SMAD, mothers against DPP homolog 5 (Drosophila); SMAD family member 5	Gallus gallus
				NM_001079757	sorting nexin 6	Gallus gallus
				NM_204202	claudin 3	Gallus gallus
				NM_001167765	cyclin C	Gallus gallus
				NM_001008454	peroxisomal membrane protein 3, 35kDa (Zellweger syndrome)	Gallus gallus
				NR_031560	microRNA 466	Gallus gallus
				NM_001006226	putative homeodomain transcription factor 2	Gallus gallus
				NM_001006331	cell division cycle 27 homolog (S. cerevisiae)	Gallus gallus
				NM_001163248	glucagon-like peptide 2 receptor	Gallus gallus
				NM_001031345	cathepsin S	Gallus gallus
				NM_204691	guanine nucleotide binding protein (G protein), alpha transducing activity polypeptide 1	Gallus gallus
				NM_001031322	muscleblind-like (Drosophila)	Gallus gallus
				NM_001163325	muscleblind-like (Drosophila)	Gallus gallus
				NM_001163327	muscleblind-like (Drosophila)	Gallus gallus
				NM_001163324	muscleblind-like (Drosophila)	Gallus gallus
				NM_001163326	muscleblind-like (Drosophila)	Gallus gallus
				NM_001007946	activating signal cointegrator 1 complex subunit 1; sphingosine-1-phosphate lyase 1	Gallus gallus
				NM_001030700	COX10 homolog, cytochrome c oxidase assembly protein, heme A: farnesyltransferase (yeast)	Gallus gallus
				NM_001031243	3-hydroxyisobutyryl-Coenzyme A hydrolase	Gallus gallus
				NM_001135550	microsomal glutathione S-transferase 1	Gallus gallus
				NM_001031143	heterogeneous nuclear ribonucleoprotein D (AU-rich element RNA binding protein 1, 37kDa)	Gallus gallus
				NM_001001759	protocadherin 21	Gallus gallus
				NM_204462	potassium voltage-gated channel, shaker-related subfamily, member 10	Gallus gallus
				NM_001079714	collagen, type I, alpha 2	Gallus gallus
				NM_001031574	similar to mucosa associated lymphoid tissue lymphoma translocation gene 1; paracaspase	Gallus gallus
				NM_001004399	lymphocyte antigen 86	Gallus gallus
				NM_205151	beaded filament structural protein 1, filensin	Gallus gallus
				NM_001007851	Ras association (RalGDS/AF-6) domain family 3	Gallus gallus
				NM_001006201	cyclin-dependent kinase 9	Gallus gallus
				NM_001030662	zinc finger, CCHC domain containing 8	Gallus gallus
				NM_001044647	MAM domain containing glycosylphosphatidylinositol anchor 1	Gallus gallus
				NM_205104	bleomycin hydrolase	Gallus gallus
				NM_001030575	KIAA1609	Gallus gallus
				NM_001031201	protein kinase D1	Gallus gallus
				NM_204794	estrogen receptor 2 (ER beta)	Gallus gallus
				NM_001012923	RAB GTPase activating protein 1-like	Gallus gallus
				NM_001004395	contactin 2 (axonal)	Gallus gallus
