# Supplementary material for: Identification and Profiling of MicroRNAs in the Embryonic Breast Muscle of Pekin Duck
Source: PLoS One. 2014 Jan 23;9(1):e86150. doi: 10.1371/journal.pone.0086150 (PMC3900480; doi:10.1371/journal.pone.0086150)
Supplement: Table S8 — The pathways and the relative genes among the targets of novel-mir-8. (XLSX) [file pone.0086150.s008.xlsx]

## Sheet: Sheet1
Table S8 The pathways and the relative genes among the targets of novel-mir-8
Pathways	GenBank_Accession	Gene Name	Species
Natural killer cell mediated cytotoxicity	NM_204725	caspase 3, apoptosis-related cysteine peptidase	Gallus gallus
	NM_204859	interferon (alpha, beta and omega) receptor 1	Gallus gallus
	NM_001130387	interferon gamma receptor 1	Gallus gallus
	NM_001008676	interferon gamma receptor 2 (interferon gamma transducer 1)	Gallus gallus
	NM_001005830	mitogen-activated protein kinase kinase 1	Gallus gallus
	NM_001012549	neuroblastoma RAS viral (v-ras) oncogene homolog	Gallus gallus
	NM_001012696	phosphoinositide-3-kinase, catalytic, delta polypeptide	Gallus gallus
	NM_001030340	protein phosphatase 3 (formerly 2B), catalytic subunit, beta isoform	Gallus gallus
	NM_001031430	spleen tyrosine kinase	Gallus gallus
	NM_205292	v-Ha-ras Harvey rat sarcoma viral oncogene homolog	Gallus gallus
	NM_206863	vav 3 oncogene	Gallus gallus
Cytokine-cytokine receptor interaction	NM_204733	CD40 ligand (TNF superfamily, member 5, hyper-IgM syndrome)	Gallus gallus
	NM_001001465	bone morphogenetic protein receptor, type II (serine/threonine kinase)	Gallus gallus
	NM_001012611	ectodysplasin A receptor	Gallus gallus
	NM_001001292	epidermal growth factor (beta-urogastrone)	Gallus gallus
	NM_205497	epidermal growth factor receptor (erythroblastic leukemia viral (v-erb-b) oncogene homolog, avian)	Gallus gallus
	NM_204859	interferon (alpha, beta and omega) receptor 1	Gallus gallus
	NM_001130387	interferon gamma receptor 1	Gallus gallus
	NM_001008676	interferon gamma receptor 2 (interferon gamma transducer 1)	Gallus gallus
	NM_205485	interleukin 1 receptor, type I	Gallus gallus
	NM_204857	interleukin 10 receptor, beta	Gallus gallus
	NM_205018	interleukin 8	Gallus gallus
	NM_001004368	kinase insert domain receptor (a type III receptor tyrosine kinase)	Gallus gallus
	NM_204323	leptin receptor	Gallus gallus
	NM_204409	tumor necrosis factor (ligand) superfamily, member 8	Gallus gallus
	NM_204439	tumor necrosis factor receptor superfamily, member 1B	Gallus gallus
Cell adhesion molecules (CAMs)	NM_204733	CD40 ligand (TNF superfamily, member 5, hyper-IgM syndrome)	Gallus gallus
	NM_001079739	CD80 molecule	Gallus gallus
	NM_205179	activated leukocyte cell adhesion molecule	Gallus gallus
	NM_001001615	cadherin 2, type 1, N-cadherin (neuronal)	Gallus gallus
	NM_001004391	cadherin 4, type 1, R-cadherin (retinal)	Gallus gallus
	NM_204227	cadherin 5, type 2, VE-cadherin (vascular epithelium)	Gallus gallus
	NM_001004381	contactin 1	Gallus gallus
	NM_001012858	integrin, alpha 9	Gallus gallus
	NM_001004493, NM_001160323, NM_001160320, NM_001004709, NM_001160324, NM_001160321	neurofascin	Gallus gallus
	NM_205153	neuron-glia cell adhesion molecule (Ng-CAM)	Gallus gallus
	NM_204787	versican	Gallus gallus
Regulation of actin cytoskeleton	NM_205323	actinin, alpha 2; similar to alpha-actinin	Gallus gallus
	NM_001031553	bradykinin receptor B2	Gallus gallus
	NM_001030765	cholinergic receptor, muscarinic 2	Gallus gallus
	NM_204210	diaphanous homolog 1 (Drosophila)	Gallus gallus
	NM_204300	enabled homolog (Drosophila)	Gallus gallus
	NM_001001292	epidermal growth factor (beta-urogastrone)	Gallus gallus
	NM_205497	epidermal growth factor receptor (erythroblastic leukemia viral (v-erb-b) oncogene homolog, avian)	Gallus gallus
	NM_205509	fibroblast growth factor receptor 3	Gallus gallus
	NM_001012858	integrin, alpha 9	Gallus gallus
	NM_001005830	mitogen-activated protein kinase kinase 1	Gallus gallus
	NM_001012549	neuroblastoma RAS viral (v-ras) oncogene homolog	Gallus gallus
	NM_001012696	phosphoinositide-3-kinase, catalytic, delta polypeptide	Gallus gallus
	NM_205122	protein phosphatase 1, catalytic subunit, beta isoform	Gallus gallus
	NM_205292	v-Ha-ras Harvey rat sarcoma viral oncogene homolog	Gallus gallus
	NM_206863	vav 3 oncogene	Gallus gallus
	NM_205441	vinculin	Gallus gallus
Toll-like receptor signaling pathway	NM_001079739	CD80 molecule	Gallus gallus
	NM_204859	interferon (alpha, beta and omega) receptor 1	Gallus gallus
	NM_205018	interleukin 8	Gallus gallus
	NM_001005830	mitogen-activated protein kinase kinase 1	Gallus gallus
	NM_205134	nuclear factor of kappa light polypeptide gene enhancer in B-cells 1	Gallus gallus
	NM_001012696	phosphoinositide-3-kinase, catalytic, delta polypeptide	Gallus gallus
	NM_001012914	signal transducer and activator of transcription 1, 91kDa; signal transducer and activator of transcription 4	Gallus gallus
	NM_001024586	toll-like receptor 5	Gallus gallus
	NM_001081709	toll-like receptor 6	Gallus gallus
MAPK signaling pathway	NM_205034	calcium channel, voltage-dependent, L type, alpha 1D subunit	Gallus gallus
	NM_204293	calcium channel, voltage-dependent, N type, alpha 1B subunit	Gallus gallus
	NM_001001733	calcium channel, voltage-dependent, beta 4 subunit	Gallus gallus
	NM_204660	calcium channel, voltage-dependent, gamma subunit 3	Gallus gallus
	NM_204725	caspase 3, apoptosis-related cysteine peptidase	Gallus gallus
	NM_001001292	epidermal growth factor (beta-urogastrone)	Gallus gallus
	NM_205497	epidermal growth factor receptor (erythroblastic leukemia viral (v-erb-b) oncogene homolog, avian)	Gallus gallus
	NM_205509	fibroblast growth factor receptor 3	Gallus gallus
	NM_205485	interleukin 1 receptor, type I	Gallus gallus
	NM_001005830	mitogen-activated protein kinase kinase 1	Gallus gallus
	NM_001012549	neuroblastoma RAS viral (v-ras) oncogene homolog	Gallus gallus
	NM_205378	neurotrophic tyrosine kinase, receptor, type 1	Gallus gallus
	NM_205231	neurotrophic tyrosine kinase, receptor, type 2	Gallus gallus
	NM_205134	nuclear factor of kappa light polypeptide gene enhancer in B-cells 1	Gallus gallus
	NM_001030340	protein phosphatase 3 (formerly 2B), catalytic subunit, beta isoform	Gallus gallus
	NM_001109771	ribosomal protein S6 kinase, 90kDa, polypeptide 1	Gallus gallus
	NM_204246	transforming growth factor, beta receptor I (activin A receptor type II-like kinase, 53kDa)	Gallus gallus
	NM_205292	v-Ha-ras Harvey rat sarcoma viral oncogene homolog	Gallus gallus
